# Supplementary material for: Different sound exposures causes alterations in stress-related serum indicators, behaviors, and cecal microbiota of green-shell egg-laying chickens under different stocking densities
Source: PeerJ. 2024 Nov 22;12:e18544. doi: 10.7717/peerj.18544 (PMC11587876; doi:10.7717/peerj.18544)
Supplement: Supplemental Information 15 [file peerj-12-18544-s015.xlsx]

## Sheet: RAW DATA
	0=NS; 1=IMS;2=MRS	4=LD; 7=MD; 10=HD	3d	3d	12d	12d	24d	24d
group	sound	density	ACTH	CORT	ACTH	CORT	ACTH	CORT
1	0	4	13.669	15.678	7.91925	8.60294	0.284382	15.345
1	0	4	14.089	11.0185	4.62733	2.57353	2.03263	9.48571
1	0	4	14.295	12.4074	3.50932	6.251	2.534	16.678
1	0	4	10.398	14.234	2.45342	8.088	1.70978	10.6947
1	0	4	8.87	26.4815	4.217	9.11765	8.68139	21.3263
1	0	4	6.334	27.037	2.57764	2.57353	8.9653	22.9053
2	1	4	14.006	20.9259	3.18012	0.220588	3.001	9.25926
2	1	4	10.058	18.9815	5.37267	5.346	3.87413	13.6111
2	1	4	9.576	17.6852	2.23602	6.983	3.121	10.9259
2	1	4	11.695	12.1296	2.42236	4.48529	0.400932	9.35185
2	1	4	13.011	16.8519	1.8323	14.0441	6.95105	18.3148
2	1	4	8.517	11.2037	4.03727	0.367647	0.773893	9.53704
3	2	4	16.896	28.1481	5.96273	6.75926	2.70862	16.91
3	2	4	25.772	21.8519	3.04348	2.31481	3.92075	12.4381
3	2	4	12.819	31.9444	4.09938	5.92593	5.59907	20.819
3	2	4	19.406	24.005	3.63354	8.61111	2.21911	12.1524
3	2	4	21.551	14.0741	4.59627	5	4.987	25.4857
3	2	4	19.994	24.004	4.267	4.72222	4.838	13.6762
4	0	7	8.456	12.963	7.16854	13.6029	2.10256	26.4381
4	0	7	21.181	14.3519	10.7961	9.321	5.4359	11.8667
4	0	7	22.417	27.8704	11.695	7.421	3.64103	11.1158
4	0	7	16.077	17.917	3.46067	10.9559	3.98107	21.6421
4	0	7	12.467	17.917	9.47994	7.532	4.17035	21.0105
4	0	7	12.225	16.4815	3.54093	7.86765	3.86618	16.0632
5	1	7	7.714	13.7963	5.12422	8.52941	1.24009	21.6
5	1	7	8.308	18.1481	5.52795	3.89706	3.532	24.3429
5	1	7	9.143	19.506	5.49689	3.01471	1.33333	14.6286
5	1	7	12.498	25.5556	5.93168	6.69118	3.8042	9.58095
5	1	7	12.48	13.2407	6.39752	7.79412	3.99068	10.58
5	1	7	15.114	17.1296	5.69565	8.82353	0.727273	22.6286
6	2	7	15.419	22.8704	5.03106	7.59259	4.4333	29.3905
6	2	7	16.799	16.9444	6.372	12.3148	2.56876	23.438
6	2	7	19.345	23.6111	12.1739	5.55556	1.89277	33.1048
6	2	7	10.074	10.9259	6.89441	12.567	5.50583	23.438
6	2	7	18.956	18.222	5.06211	13.8889	1.91608	19.9619
6	2	7	17.602	16.7593	11.734	5.46296	1.07692	11.2952
7	0	10	9.881	22.7778	14.7287	5.36765	10.456	10.5333
7	0	10	7.265	16.8519	12.876	13.3088	9.567	18.0571
7	0	10	18.019	19.444	10.1862	7.5	12.0568	21.5368
7	0	10	14.087	23.2407	10.5233	8.67647	9.45	19.7474
7	0	10	14.825	20.6481	8.16372	7.79412	9.50158	47.7474
7	0	10	6.238	13.7037	9.52809	9.41176	11.3312	25.893
8	1	10	14.071	20.463	13.0754	13.8889	16.4141	11.3905
8	1	10	10.844	10	4.72873	7.87037	13.2199	35.6762
8	1	10	13.14	16.926	13.9101	12.815	7.678	20.152
8	1	10	10.621	9.62963	5.19422	17.963	8.123	27.8667
8	1	10	6.848	28.7963	16.0289	18.8889	10.8443	23.7323
8	1	10	9.48	15.7407	11.695	5.46296	4.345	23.6762
9	2	10	21.406	20.7407	8.80578	10.5556	5.94872	23.867
9	2	10	26.27	37.963	16.7673	14.711	15.345	19.9619
9	2	10	21.438	22.2222	14.7769	18.907	16.345	23.867
9	2	10	17.474	33.6111	16.366	9.72222	2.8951	28.4381
9	2	10	20.604	21.0185	5.51525	25.7407	4.9697	27.0095
9	2	10	21.438	13.3333	5.924	9.62963	12.346	20.0571

## Sheet: ACTH describe statistic
describe statistic
	sound	density	mean	standard deviation	n	mean	sem
D3ACTH	0	4	11.2758	3.27832	6	11.2758	1.33837
		7	15.4705	5.47703	6	15.4705	2.23599
		10	11.7192	4.65193	6	11.7192	1.89914
		total	12.8218	4.70079	18	12.8218	1.10799
	1	4	11.1438	2.12224	6	11.1438	0.8664
		7	10.8762	2.9244	6	10.8762	1.19388
		10	10.834	2.59086	6	10.834	1.05771
		total	10.9513	2.41541	18	10.9513	0.569318
	2	4	19.4063	4.3626	6	19.4063	1.78102
		7	16.3658	3.39952	6	16.3658	1.38785
		10	21.4383	2.81986	6	21.4383	1.1512
		total	19.0702	3.99199	18	19.0702	0.94092
	total	4	13.942	5.08863	18	13.942	1.1994
		7	14.2375	4.56731	18	14.2375	1.07653
		10	14.6638	5.92561	18	14.6638	1.39668
		total	14.2811	5.1331	54	14.2811	0.698527
D12ACTH	0	4	4.21733	2.00866	6	4.21733	0.820033
		7	7.69021	3.58514	6	7.69021	1.46363
		10	11.001	2.38844	6	11.001	0.975078
		total	7.63618	3.84282	18	7.63618	0.905763
	1	4	3.18012	1.32847	6	3.18012	0.542344
		7	5.69565	0.434161	6	5.69565	0.177246
		10	10.7721	4.71748	6	10.7721	1.9259
		total	6.54928	4.20442	18	6.54928	0.99099
	2	4	4.26707	0.99099	6	4.26707	0.40457
		7	7.87792	3.24325	6	7.87792	1.32405
		10	11.3592	5.21936	6	11.3592	2.13079
		total	7.83472	4.50244	18	7.83472	1.06124
	total	4	3.88817	1.50348	18	3.88817	0.354373
		7	7.08793	2.8217	18	7.08793	0.66508
		10	11.0441	4.037	18	11.0441	0.951531
		total	7.34006	4.15142	54	7.34006	0.564937
D24ACTH	0	4	4.03458	3.78505	6	4.03458	1.54524
		7	3.86618	1.07059	6	3.86618	0.437065
		10	10.3938	1.09714	6	10.3938	0.447905
		total	6.09818	3.83127	18	6.09818	0.903038
	1	4	3.02033	2.37056	6	3.02033	0.967777
		7	2.43793	1.48701	6	2.43793	0.607069
		10	10.1041	4.31394	6	10.1041	1.76116
		total	5.18744	4.54248	18	5.18744	1.07067
	2	4	4.04543	1.34659	6	4.04543	0.549743
		7	2.89895	1.7063	6	2.89895	0.696593
		10	9.64159	5.75773	6	9.64159	2.35058
		total	5.52865	4.50862	18	5.52865	1.06269
	total	4	3.70011	2.57769	18	3.70011	0.607568
		7	3.06769	1.48957	18	3.06769	0.351095
		10	10.0465	3.95975	18	10.0465	0.933322
		total	5.60476	4.24155	54	5.60476	0.577201

## Sheet: ACTH two-way ANOVA
Inter subject effect test									D3ACTH							D24ACTH
source	dependent variable	Class III sum of squares	free degree	Mean square	F	Significance			Duncan a,b							Duncan a,b
Revise the model	D3ACTH	793.011b	8	99.126	7.392	0			sound	Number of cases	subset					density	Number of cases	subset
	D12ACTH	485.702d	8	60.713	6.388	0					1	2						1	2
	D24ACTH	548.540e	8	68.568	7.619	0			1	18	10.9513					7	18	3.06769
intercept	D3ACTH	11013.3	1	11013.3	821.243	0			0	18	12.8218					4	18	3.70011
	D12ACTH	2909.33	1	2909.33	306.091	0			2	18		19.0702				10	18		10.0465
	D24ACTH	1696.32	1	1696.32	188.495	0			Significance		0.132	1				Significance		0.53	1
sound	D3ACTH	650.735	2	325.368	24.262	0			The average value of each group in the homogeneous subset will be displayed.							The average value of each group in the homogeneous subset will be displayed.
	D12ACTH	17.239	2	8.619	0.907	0.411			Based on the measured average value.。							Based on the measured average value.。
	D24ACTH	7.621	2	3.811	0.423	0.657			The error term is mean square (error) = 13.411。							The error term is mean square (error) = 8.999。
density	D3ACTH	4.741	2	2.37	0.177	0.839			a Use harmonic mean sample size = 18.000。							a Use harmonic mean sample size = 18.000。
	D12ACTH	462.581	2	231.29	24.334	0			b Alpha = .05。							b Alpha = .05。
	D24ACTH	536.278	2	268.139	29.796	0
sound*density	D3ACTH	137.534	4	34.384	2.564	0.051
	D12ACTH	5.883	4	1.471	0.155	0.96			D12ACTH
	D24ACTH	4.641	4	1.16	0.129	0.971			Duncan a,b
error	D3ACTH	603.474	45	13.411					density	Number of cases	subset
	D12ACTH	427.715	45	9.505							1	2	3
	D24ACTH	404.968	45	8.999					4	18	3.88817
total	D3ACTH	12409.8	54						7	18		7.08793
	D12ACTH	3822.75	54						10	18			11.0441
	D24ACTH	2649.82	54						Significance		1	1	1
Revised total	D3ACTH	1396.48	53						The average value of each group in the homogeneous subset will be displayed.
	D12ACTH	913.417	53						Based on the measured average value.。
	D24ACTH	953.508	53						The error term is mean square (error) = 9.505。
R-squared = .496（After adjustment R-squared = .407）a									a Use harmonic mean sample size = 18.000。
R-squared = .568（After adjustment R-squared = .491）b									b Alpha = .05。
R-squared = .101（After adjustment R-squared = -.059）c
R-squared = .532（After adjustment R-squared = .448）d
R-squared = .575（After adjustment R-squared = .500）e

## Sheet: ACTH simple effect
Paired comparison											Paired comparison
dependent variable	density	(I) sound	(J) sound	Balance value difference (I-J)	Standard error	Significanceb	95% confidence interval of the differenceb				dependent variable	sound	(I) density	(J) density	Balance value difference (I-J)	Standard error	Significanceb	95% confidence interval of the differenceb
							lower limit	upper limit										lower limit	upper limit
D3ACTH	4	0	1	0.132	2.114	0.95	-4.126	4.39			D3ACTH	0	4	7	-4.195	2.114	0.053	-8.453	0.064
			2	-8.130*	2.114	0	-12.389	-3.872						10	-0.443	2.114	0.835	-4.702	3.815
		1	0	-0.132	2.114	0.95	-4.39	4.126					7	4	4.195	2.114	0.053	-0.064	8.453
			2	-8.262*	2.114	0	-12.521	-4.004						10	3.751	2.114	0.083	-0.507	8.01
		2	0	8.130*	2.114	0	3.872	12.389					10	4	0.443	2.114	0.835	-3.815	4.702
			1	8.262*	2.114	0	4.004	12.521						7	-3.751	2.114	0.083	-8.01	0.507
	7	0	1	4.594*	2.114	0.035	0.336	8.853				1	4	7	0.268	2.114	0.9	-3.991	4.526
			2	-0.895	2.114	0.674	-5.154	3.363						10	0.31	2.114	0.884	-3.949	4.568
		1	0	-4.594*	2.114	0.035	-8.853	-0.336					7	4	-0.268	2.114	0.9	-4.526	3.991
			2	-5.490*	2.114	0.013	-9.748	-1.231						10	0.042	2.114	0.984	-4.216	4.301
		2	0	0.895	2.114	0.674	-3.363	5.154					10	4	-0.31	2.114	0.884	-4.568	3.949
			1	5.490*	2.114	0.013	1.231	9.748						7	-0.042	2.114	0.984	-4.301	4.216
	10	0	1	0.885	2.114	0.677	-3.373	5.144				2	4	7	3.04	2.114	0.157	-1.218	7.299
			2	-9.719*	2.114	0	-13.978	-5.461						10	-2.032	2.114	0.342	-6.29	2.226
		1	0	-0.885	2.114	0.677	-5.144	3.373					7	4	-3.04	2.114	0.157	-7.299	1.218
			2	-10.604*	2.114	0	-14.863	-6.346						10	-5.073*	2.114	0.021	-9.331	-0.814
		2	0	9.719*	2.114	0	5.461	13.978					10	4	2.032	2.114	0.342	-2.226	6.29
			1	10.604*	2.114	0	6.346	14.863						7	5.073*	2.114	0.021	0.814	9.331
D12ACTH	4	0	1	1.037	1.78	0.563	-2.548	4.622			D12ACTH	0	4	7	-3.473	1.78	0.057	-7.058	0.112
			2	-0.05	1.78	0.978	-3.635	3.535						10	-6.784*	1.78	0	-10.369	-3.199
		1	0	-1.037	1.78	0.563	-4.622	2.548					7	4	3.473	1.78	0.057	-0.112	7.058
			2	-1.087	1.78	0.544	-4.672	2.498						10	-3.311	1.78	0.069	-6.896	0.274
		2	0	0.05	1.78	0.978	-3.535	3.635					10	4	6.784*	1.78	0	3.199	10.369
			1	1.087	1.78	0.544	-2.498	4.672						7	3.311	1.78	0.069	-0.274	6.896
	7	0	1	1.995	1.78	0.268	-1.59	5.58				1	4	7	-2.516	1.78	0.164	-6.101	1.069
			2	-0.188	1.78	0.916	-3.773	3.397						10	-7.592*	1.78	0	-11.177	-4.007
		1	0	-1.995	1.78	0.268	-5.58	1.59					7	4	2.516	1.78	0.164	-1.069	6.101
			2	-2.182	1.78	0.227	-5.767	1.403						10	-5.076*	1.78	0.007	-8.661	-1.491
		2	0	0.188	1.78	0.916	-3.397	3.773					10	4	7.592*	1.78	0	4.007	11.177
			1	2.182	1.78	0.227	-1.403	5.767						7	5.076*	1.78	0.007	1.491	8.661
	10	0	1	0.229	1.78	0.898	-3.356	3.814				2	4	7	-3.611*	1.78	0.048	-7.196	-0.026
			2	-0.358	1.78	0.841	-3.943	3.227						10	-7.092*	1.78	0	-10.677	-3.507
		1	0	-0.229	1.78	0.898	-3.814	3.356					7	4	3.611*	1.78	0.048	0.026	7.196
			2	-0.587	1.78	0.743	-4.172	2.998						10	-3.481	1.78	0.057	-7.066	0.104
		2	0	0.358	1.78	0.841	-3.227	3.943					10	4	7.092*	1.78	0	3.507	10.677
			1	0.587	1.78	0.743	-2.998	4.172						7	3.481	1.78	0.057	-0.104	7.066
D24ACTH	4	0	1	1.014	1.732	0.561	-2.474	4.503			D24ACTH	0	4	7	0.168	1.732	0.923	-3.32	3.657
			2	-0.011	1.732	0.995	-3.499	3.478						10	-6.359*	1.732	0.001	-9.848	-2.871
		1	0	-1.014	1.732	0.561	-4.503	2.474					7	4	-0.168	1.732	0.923	-3.657	3.32
			2	-1.025	1.732	0.557	-4.513	2.463						10	-6.528*	1.732	0	-10.016	-3.039
		2	0	0.011	1.732	0.995	-3.478	3.499					10	4	6.359*	1.732	0.001	2.871	9.848
			1	1.025	1.732	0.557	-2.463	4.513						7	6.528*	1.732	0	3.039	10.016
	7	0	1	1.428	1.732	0.414	-2.06	4.917				1	4	7	0.582	1.732	0.738	-2.906	4.071
			2	0.967	1.732	0.579	-2.521	4.456						10	-7.084*	1.732	0	-10.572	-3.595
		1	0	-1.428	1.732	0.414	-4.917	2.06					7	4	-0.582	1.732	0.738	-4.071	2.906
			2	-0.461	1.732	0.791	-3.949	3.027						10	-7.666*	1.732	0	-11.155	-4.178
		2	0	-0.967	1.732	0.579	-4.456	2.521					10	4	7.084*	1.732	0	3.595	10.572
			1	0.461	1.732	0.791	-3.027	3.949						7	7.666*	1.732	0	4.178	11.155
	10	0	1	0.29	1.732	0.868	-3.199	3.778				2	4	7	1.146	1.732	0.511	-2.342	4.635
			2	0.752	1.732	0.666	-2.736	4.241						10	-5.596*	1.732	0.002	-9.085	-2.108
		1	0	-0.29	1.732	0.868	-3.778	3.199					7	4	-1.146	1.732	0.511	-4.635	2.342
			2	0.462	1.732	0.791	-3.026	3.951						10	-6.743*	1.732	0	-10.231	-3.254
		2	0	-0.752	1.732	0.666	-4.241	2.736					10	4	5.596*	1.732	0.002	2.108	9.085
			1	-0.462	1.732	0.791	-3.951	3.026						7	6.743*	1.732	0	3.254	10.231
Based on estimated marginal mean											Based on estimated marginal mean
Balance value difference Significance is .05。*											Balance value difference Significance is .05。*
Multiple comparison adjustment: Least significant difference method (equivalent to no adjustment).b											Multiple comparison adjustment: Least significant difference method (equivalent to no adjustment).b
Univariate test											Univariate test
dependent variable	density		Square sum	freee degree	Mean square	F	Significance				dependent variable	sound		Square sum	freee degree	Mean square	F	Significance
D3ACTH	4	contrast	268.783	2	134.391	10.021	0				D3ACTH	0	contrast	63.729	2	31.864	2.376	0.104
		error	603.474	45	13.411								error	603.474	45	13.411
	7	contrast	104.092	2	52.046	3.881	0.028					1	contrast	0.339	2	0.169	0.013	0.987
		error	603.474	45	13.411								error	603.474	45	13.411
	10	contrast	415.395	2	207.698	15.488	0					2	contrast	78.208	2	39.104	2.916	0.064
		error	603.474	45	13.411								error	603.474	45	13.411
D12ACTH	4	contrast	4.519	2	2.26	0.238	0.789				D12ACTH	0	contrast	138.081	2	69.041	7.264	0.002
		error	427.715	45	9.505								error	427.715	45	9.505
	7	contrast	17.552	2	8.776	0.923	0.405					1	contrast	179.471	2	89.736	9.441	0
		error	427.715	45	9.505								error	427.715	45	9.505
	10	contrast	1.051	2	0.525	0.055	0.946					2	contrast	150.911	2	75.456	7.939	0.001
		error	427.715	45	9.505								error	427.715	45	9.505
D24ACTH	4	contrast	4.159	2	2.08	0.231	0.795				D24ACTH	0	contrast	166.154	2	83.077	9.232	0
		error	404.968	45	8.999								error	404.968	45	8.999
	7	contrast	6.376	2	3.188	0.354	0.704					1	contrast	218.576	2	109.288	12.144	0
		error	404.968	45	8.999								error	404.968	45	8.999
	10	contrast	1.727	2	0.864	0.096	0.909					2	contrast	156.189	2	78.095	8.678	0.001
		error	404.968	45	8.999								error	404.968	45	8.999
Each F will test the simple effects of the sound source in each level combination of the other shown effects. These tests are based on linearly independent pairwise comparisons between estimated marginal means.											Each F will test the simple effects of density in each level combination of other shown effects. These tests are based on linearly independent pairwise comparisons between estimated marginal means.

## Sheet: CORT describe statistic
describe statistic
	sound	density	mean	standard deviation	n	mean	sem
D3CORT	0	4	17.8094	7.11306	6	17.8094	2.9039
		7	17.9168	5.26086	6	17.9168	2.14774
		10	19.4444	3.65101	6	19.4444	1.49052
		total	18.3902	5.24711	18	18.3902	1.23676
	1	4	16.2963	3.85167	6	16.2963	1.57244
		7	17.8961	4.48087	6	17.8961	1.82931
		10	16.9259	7.15577	6	16.9259	2.92133
		total	17.0394	5.07814	18	17.0394	1.19693
	2	4	24.0046	6.05739	6	24.0046	2.47292
		7	18.2222	4.64014	6	18.2222	1.89433
		10	24.8148	9.16302	6	24.8148	3.74079
		total	22.3472	7.13743	18	22.3472	1.68231
	total	4	19.3701	6.46616	18	19.3701	1.52409
		7	18.0117	4.51682	18	18.0117	1.06462
		10	20.395	7.42538	18	20.395	1.75018
		total	19.2589	6.21379	54	19.2589	0.84559
D12CORT	0	4	6.20111	2.97175	6	6.20111	1.21321
		7	9.45008	2.44257	6	9.45008	0.997173
		10	8.67647	2.64992	6	8.67647	1.08182
		total	8.10922	2.907	18	8.10922	0.685186
	1	4	5.2411	5.1003	6	5.2411	2.08219
		7	6.45833	2.45523	6	6.45833	1.00234
		10	12.8148	5.34881	6	12.8148	2.18364
		total	8.17143	5.43275	18	8.17143	1.28051
	2	4	5.55556	2.11792	6	5.55556	0.864638
		7	9.56364	3.79637	6	9.56364	1.54986
		10	14.8777	6.43538	6	14.8777	2.62723
		total	9.99896	5.75977	18	9.99896	1.35759
	total	4	5.66592	3.42589	18	5.66592	0.80749
		7	8.49068	3.15526	18	8.49068	0.743702
		10	12.123	5.44979	18	12.123	1.28453
		total	8.75987	4.85813	54	8.75987	0.661108
D24CORT	0	4	16.0725	5.43123	6	16.0725	2.21729
		7	18.0227	6.03801	6	18.0227	2.46501
		10	23.9192	12.7146	6	23.9192	5.1907
		total	19.3381	8.87284	18	19.3381	2.09135
	1	4	11.8333	3.57911	6	11.8333	1.46116
		7	17.2268	6.45495	6	17.2268	2.63522
		10	23.749	8.0609	6	23.749	3.29085
		total	17.603	7.76301	18	17.603	1.82976
	2	4	16.9136	5.32755	6	16.9136	2.17496
		7	23.4381	7.59484	6	23.4381	3.10058
		10	23.8668	3.47952	6	23.8668	1.42051
		total	21.4061	6.29218	18	21.4061	1.48308
	total	4	14.9398	5.10149	18	14.9398	1.20243
		7	19.5625	6.92865	18	19.5625	1.6331
		10	23.845	8.38001	18	23.845	1.97519
		total	19.4491	7.72941	54	19.4491	1.05184

## Sheet: CORT two-way ANOVA
Inter subject effect test									D3CORT							D24CORT
source	dependent variable	Class III sum of squares	free degree	Mean square	F	Significance			Duncan a,b							Duncan a,b
Revise the model	D3CORT	446.870b	8	55.859	1.571	0.16			sound	Number of cases	subset					density	Number of cases	subset
	D12CORT	536.962d	8	67.12	4.231	0.001					1	2						1	2
	D24CORT	940.209e	8	117.526	2.376	0.032			1	18	17.0394					4	18	14.9398
intercept	D3CORT	20029	1	20029	563.483	0			0	18	18.3902	18.3902				7	18	19.5625	19.5625
	D12CORT	4143.71	1	4143.71	261.19	0			2	18		22.3472				10	18		23.845
	D24CORT	20426.5	1	20426.5	412.895	0			Significance		0.5	0.053				Significance		0.055	0.074
sound	D3CORT	273.929	2	136.964	3.853	0.029			The average value of each group in the homogeneous subset will be displayed.							The average value of each group in the homogeneous subset will be displayed.
	D12CORT	41.489	2	20.745	1.308	0.281			Based on the measured average value.。							Based on the measured average value.。
	D24CORT	130.585	2	65.293	1.319	0.277			The error term is mean square (error) = 35.545。							The error term is mean square (error).= 49.471。
density	D3CORT	51.458	2	25.729	0.724	0.49			a Use harmonic mean sample size = 18.000。							a Use harmonic mean sample size = 18.000。
	D12CORT	377.201	2	188.601	11.888	0			b Alpha = .05。							b Alpha = .05。
	D24CORT	717.182	2	358.591	7.246	0.002
sound*density	D3CORT	121.483	4	30.371	0.854	0.499
	D12CORT	118.271	4	29.568	1.864	0.133			D12CORT
	D24CORT	94.789	4	23.697	0.479	0.751			Duncan a,b
error	D3CORT	1599.52	45	35.545					density	Number of cases	subset
	D12CORT	713.913	45	15.865							1	2	3
	D24CORT	2226.21	45	49.471					4	18	5.66592
total	D3CORT	22075.4	54						7	18		8.49068
	D12CORT	5394.58	54						10	18			12.123
	D24CORT	23592.9	54						Significance		1	1	1
Revised total	D3CORT	2046.39	53						The average value of each group in the homogeneous subset will be displayed.
	D12CORT	1250.88	53						Based on the measured average value.。
	D24CORT	3166.42	53						The error term is mean square (error).= 15.865。
R-squared = .506（After adjustment R-squared = .418）a									a Use harmonic mean sample size = 18.000。
R-squared = .218（After adjustment R-squared = .079）b									b Alpha = .05。
R-squared = .090（After adjustment R-squared = -.071）c
R-squared = .429（After adjustment R-squared = .328）d
R-squared = .297（After adjustment R-squared = .172）e

## Sheet: CORT simple effect
Paired comparison												Paired comparison
dependent variable	density	(I) sound	(J) sound	Balance value difference (I-J)	Standard error	Significanceb	95% confidence interval of the differenceb					dependent variable	sound	(I) density	(J) density	Balance value difference (I-J)	Standard error	Significanceb	95% confidence interval of the differenceb
							lower limit	upper limit											lower limit	upper limit
D3CORT	4	0	1	1.513	3.442	0.662	-5.42	8.446				D3CORT	0	4	7	-0.107	3.442	0.975	-7.04	6.825
			2	-6.195	3.442	0.079	-13.128	0.738							10	-1.635	3.442	0.637	-8.568	5.298
		1	0	-1.513	3.442	0.662	-8.446	5.42						7	4	0.107	3.442	0.975	-6.825	7.04
			2	-7.708*	3.442	0.03	-14.641	-0.775							10	-1.528	3.442	0.659	-8.46	5.405
		2	0	6.195	3.442	0.079	-0.738	13.128						10	4	1.635	3.442	0.637	-5.298	8.568
			1	7.708*	3.442	0.03	0.775	14.641							7	1.528	3.442	0.659	-5.405	8.46
	7	0	1	0.021	3.442	0.995	-6.912	6.954					1	4	7	-1.6	3.442	0.644	-8.533	5.333
			2	-0.305	3.442	0.93	-7.238	6.627							10	-0.63	3.442	0.856	-7.562	6.303
		1	0	-0.021	3.442	0.995	-6.954	6.912						7	4	1.6	3.442	0.644	-5.333	8.533
			2	-0.326	3.442	0.925	-7.259	6.607							10	0.97	3.442	0.779	-5.963	7.903
		2	0	0.305	3.442	0.93	-6.627	7.238						10	4	0.63	3.442	0.856	-6.303	7.562
			1	0.326	3.442	0.925	-6.607	7.259							7	-0.97	3.442	0.779	-7.903	5.963
	10	0	1	2.518	3.442	0.468	-4.414	9.451					2	4	7	5.782	3.442	0.1	-1.15	12.715
			2	-5.37	3.442	0.126	-12.303	1.562							10	-0.81	3.442	0.815	-7.743	6.123
		1	0	-2.518	3.442	0.468	-9.451	4.414						7	4	-5.782	3.442	0.1	-12.715	1.15
			2	-7.889*	3.442	0.027	-14.822	-0.956							10	-6.593	3.442	0.062	-13.525	0.34
		2	0	5.37	3.442	0.126	-1.562	12.303						10	4	0.81	3.442	0.815	-6.123	7.743
			1	7.889*	3.442	0.027	0.956	14.822							7	6.593	3.442	0.062	-0.34	13.525
D12CORT	4	0	1	0.96	2.3	0.678	-3.672	5.592				D12CORT	0	4	7	-3.249	2.3	0.165	-7.881	1.383
			2	0.646	2.3	0.78	-3.986	5.277							10	-2.475	2.3	0.287	-7.107	2.156
		1	0	-0.96	2.3	0.678	-5.592	3.672						7	4	3.249	2.3	0.165	-1.383	7.881
			2	-0.314	2.3	0.892	-4.946	4.317							10	0.774	2.3	0.738	-3.858	5.405
		2	0	-0.646	2.3	0.78	-5.277	3.986						10	4	2.475	2.3	0.287	-2.156	7.107
			1	0.314	2.3	0.892	-4.317	4.946							7	-0.774	2.3	0.738	-5.405	3.858
	7	0	1	2.992	2.3	0.2	-1.64	7.623					1	4	7	-1.217	2.3	0.599	-5.849	3.414
			2	-0.114	2.3	0.961	-4.745	4.518							10	-7.574*	2.3	0.002	-12.205	-2.942
		1	0	-2.992	2.3	0.2	-7.623	1.64						7	4	1.217	2.3	0.599	-3.414	5.849
			2	-3.105	2.3	0.184	-7.737	1.526							10	-6.357*	2.3	0.008	-10.988	-1.725
		2	0	0.114	2.3	0.961	-4.518	4.745						10	4	7.574*	2.3	0.002	2.942	12.205
			1	3.105	2.3	0.184	-1.526	7.737							7	6.357*	2.3	0.008	1.725	10.988
	10	0	1	-4.138	2.3	0.079	-8.77	0.493					2	4	7	-4.008	2.3	0.088	-8.64	0.624
			2	-6.201*	2.3	0.01	-10.833	-1.57							10	-9.322*	2.3	0	-13.954	-4.69
		1	0	4.138	2.3	0.079	-0.493	8.77						7	4	4.008	2.3	0.088	-0.624	8.64
			2	-2.063	2.3	0.374	-6.695	2.569							10	-5.314*	2.3	0.025	-9.946	-0.682
		2	0	6.201*	2.3	0.01	1.57	10.833						10	4	9.322*	2.3	0	4.69	13.954
			1	2.063	2.3	0.374	-2.569	6.695							7	5.314*	2.3	0.025	0.682	9.946
D24CORT	4	0	1	4.239	4.061	0.302	-3.94	12.418				D24CORT	0	4	7	-1.95	4.061	0.633	-10.129	6.229
			2	-0.841	4.061	0.837	-9.02	7.338							10	-7.847	4.061	0.06	-16.026	0.332
		1	0	-4.239	4.061	0.302	-12.418	3.94						7	4	1.95	4.061	0.633	-6.229	10.129
			2	-5.08	4.061	0.217	-13.259	3.099							10	-5.896	4.061	0.153	-14.075	2.283
		2	0	0.841	4.061	0.837	-7.338	9.02						10	4	7.847	4.061	0.06	-0.332	16.026
			1	5.08	4.061	0.217	-3.099	13.259							7	5.896	4.061	0.153	-2.283	14.075
	7	0	1	0.796	4.061	0.845	-7.383	8.975					1	4	7	-5.393	4.061	0.191	-13.572	2.785
			2	-5.415	4.061	0.189	-13.594	2.764							10	-11.916*	4.061	0.005	-20.095	-3.737
		1	0	-0.796	4.061	0.845	-8.975	7.383						7	4	5.393	4.061	0.191	-2.785	13.572
			2	-6.211	4.061	0.133	-14.39	1.968							10	-6.522	4.061	0.115	-14.701	1.657
		2	0	5.415	4.061	0.189	-2.764	13.594						10	4	11.916*	4.061	0.005	3.737	20.095
			1	6.211	4.061	0.133	-1.968	14.39							7	6.522	4.061	0.115	-1.657	14.701
	10	0	1	0.17	4.061	0.967	-8.009	8.349					2	4	7	-6.524	4.061	0.115	-14.703	1.654
			2	0.052	4.061	0.99	-8.127	8.231							10	-6.953	4.061	0.094	-15.132	1.226
		1	0	-0.17	4.061	0.967	-8.349	8.009						7	4	6.524	4.061	0.115	-1.654	14.703
			2	-0.118	4.061	0.977	-8.297	8.061							10	-0.429	4.061	0.916	-8.608	7.75
		2	0	-0.052	4.061	0.99	-8.231	8.127						10	4	6.953	4.061	0.094	-1.226	15.132
			1	0.118	4.061	0.977	-8.061	8.297							7	0.429	4.061	0.916	-7.75	8.608
Based on estimated marginal mean												Based on estimated marginal mean
Balance value difference Significance is .05。*												Balance value difference Significance is .05。*
Multiple comparison adjustment: Least significant difference method (equivalent to no adjustment).b												Multiple comparison adjustment: Least significant difference method (equivalent to no adjustment).b
Univariate test												Univariate test
dependent variable	density		Square sum	freee degree	Mean square	F	Significance					dependent variable	sound		Square sum	freee degree	Mean square	F	Significance
D3CORT	4	contrast	200.175	2	100.087	2.816	0.07					D3CORT	0	contrast	10.036	2	5.018	0.141	0.869
		error	1599.52	45	35.545									error	1599.52	45	35.545
	7	contrast	0.4	2	0.2	0.006	0.994						1	contrast	7.794	2	3.897	0.11	0.896
		error	1599.52	45	35.545									error	1599.52	45	35.545
	10	contrast	194.837	2	97.419	2.741	0.075						2	contrast	155.111	2	77.555	2.182	0.125
		error	1599.52	45	35.545									error	1599.52	45	35.545
D12CORT	4	contrast	2.874	2	1.437	0.091	0.914					D12CORT	0	contrast	34.563	2	17.282	1.089	0.345
		error	713.913	45	15.865									error	713.913	45	15.865
	7	contrast	37.213	2	18.606	1.173	0.319						1	contrast	198.497	2	99.248	6.256	0.004
		error	713.913	45	15.865									error	713.913	45	15.865
	10	contrast	119.673	2	59.837	3.772	0.031						2	contrast	262.412	2	131.206	8.27	0.001
		error	713.913	45	15.865									error	713.913	45	15.865
D24CORT	4	contrast	88.974	2	44.487	0.899	0.414					D24CORT	0	contrast	200.283	2	100.142	2.024	0.144
		error	2226.21	45	49.471									error	2226.21	45	49.471
	7	contrast	137.078	2	68.539	1.385	0.261						1	contrast	427.221	2	213.611	4.318	0.019
		error	2226.21	45	49.471									error	2226.21	45	49.471
	10	contrast	0.091	2	0.046	0.001	0.999						2	contrast	182.2	2	91.1	1.841	0.17
		error	2226.21	45	49.471									error	2226.21	45	49.471
Each F will test the simple effects of the sound source in each level combination of the other shown effects. These tests are based on linearly independent pairwise comparisons between estimated marginal means.												Each F will test the simple effects of density in each level combination of other shown effects. These tests are based on linearly independent pairwise comparisons between estimated marginal means.
