# Supplementary material for: Different sound exposures causes alterations in stress-related serum indicators, behaviors, and cecal microbiota of green-shell egg-laying chickens under different stocking densities
Source: PeerJ. 2024 Nov 22;12:e18544. doi: 10.7717/peerj.18544 (PMC11587876; doi:10.7717/peerj.18544)
Supplement: Supplemental Information 16 [file peerj-12-18544-s016.xlsx]

## Sheet: behavior Raw Data
	0=NS; 1=IMS; 2=MRS	4=LD; 7=MD; 10=HD		Preen(frequency)	Preen(duration)	Feather-Peck(frequency)	Feather-Peck(duration)
group	sound	density	time	pn	pd	fn	fd
1	0	4	3	1	14	1	4
1	0	4	3	3	26	1	3
1	0	4	3	2	37	0	0
1	0	4	3	7	116	0	0
1	0	4	3	0	0	1	3
1	0	4	3	0	0	0	0
1	0	4	3	2	11	1	3
1	0	4	3	4	21	1	5
1	0	4	3	1	11	0	0
1	0	4	3	2	37	2	6
1	0	4	3	2	8	0	0
1	0	4	3	1	3	1	2
1	0	4	3	4	13	2	4
1	0	4	3	9	199	0	0
1	0	4	3	2	10	1	1
2	0	7	3	2	9	8	31
2	0	7	3	4	34	2	9
2	0	7	3	2	11	4	14
2	0	7	3	3	24	1	3
2	0	7	3	3	14	1	2
2	0	7	3	3	13	6	30
2	0	7	3	2	5	1	1
2	0	7	3	1	3	5	14
2	0	7	3	9	115	0	0
2	0	7	3	2	7	2	10
2	0	7	3	8	103	6	55
2	0	7	3	0	0	2	4
2	0	7	3	3	15	2	9
2	0	7	3	1	5	2	9
2	0	7	3	0	0	2	5
3	0	10	3	4	17	4	32
3	0	10	3	5	26	5	16
3	0	10	3	3	44	4	23
3	0	10	3	3	26	5	29
3	0	10	3	2	10	2	5
3	0	10	3	4	43	4	14
3	0	10	3	5	67	0	0
3	0	10	3	2	43	4	11
3	0	10	3	5	44	3	23
3	0	10	3	7	76	0	0
3	0	10	3	7	58	2	9
3	0	10	3	2	21	3	16
3	0	10	3	2	8	3	10
3	0	10	3	3	18	1	3
3	0	10	3	3	21	0	0
4	1	4	3	3	10	0	0
4	1	4	3	15	199	2	6
4	1	4	3	18	302	2	6
4	1	4	3	11	159	0	0
4	1	4	3	0	0	0	0
4	1	4	3	4	13	0	0
4	1	4	3	2	9	1	5
4	1	4	3	19	277	1	3
4	1	4	3	12	215	0	0
4	1	4	3	12	287	0	0
4	1	4	3	13	280	0	0
4	1	4	3	7	66	0	0
4	1	4	3	7	148	1	3
4	1	4	3	11	191	1	4
4	1	4	3	11	216	0	0
5	1	7	3	2	9	0	0
5	1	7	3	2	12	0	0
5	1	7	3	4	79	0	0
5	1	7	3	8	119	1	4
5	1	7	3	7	52	4	11
5	1	7	3	7	58	2	5
5	1	7	3	2	13	0	0
5	1	7	3	3	12	0	0
5	1	7	3	4	38	2	4
5	1	7	3	5	22	1	4
5	1	7	3	7	71	0	0
5	1	7	3	11	122	0	0
5	1	7	3	5	20	0	0
5	1	7	3	4	23	0	0
5	1	7	3	0	0	0	0
6	1	10	3	7	63	1	2
6	1	10	3	5	38	2	6
6	1	10	3	6	42	1	6
6	1	10	3	6	52	0	0
6	1	10	3	5	65	1	4
6	1	10	3	5	103	0	0
6	1	10	3	6	52	1	4
6	1	10	3	3	27	0	0
6	1	10	3	8	63	0	0
6	1	10	3	5	95	0	0
6	1	10	3	6	82	0	0
6	1	10	3	8	158	0	0
6	1	10	3	5	34	0	0
6	1	10	3	6	65	0	0
6	1	10	3	6	67	0	0
7	2	4	3	0	0	6	21
7	2	4	3	0	0	5	16
7	2	4	3	0	0	4	18
7	2	4	3	2	9	7	19
7	2	4	3	4	20	1	4
7	2	4	3	0	0	4	11
7	2	4	3	1	3	3	10
7	2	4	3	7	77	7	65
7	2	4	3	3	20	5	15
7	2	4	3	0	0	4	16
7	2	4	3	1	4	14	88
7	2	4	3	0	0	4	15
7	2	4	3	2	8	2	7
7	2	4	3	3	19	6	20
7	2	4	3	0	0	2	6
8	2	7	3	5	38	6	30
8	2	7	3	2	21	6	19
8	2	7	3	8	53	3	22
8	2	7	3	0	0	5	22
8	2	7	3	2	6	3	9
8	2	7	3	2	6	3	20
8	2	7	3	4	42	2	7
8	2	7	3	11	93	8	35
8	2	7	3	5	49	4	37
8	2	7	3	4	45	7	21
8	2	7	3	3	13	4	13
8	2	7	3	2	11	3	68
8	2	7	3	0	0	3	24
8	2	7	3	0	0	5	19
8	2	7	3	5	17	8	42
9	2	10	3	3	20	5	18
9	2	10	3	6	37	5	24
9	2	10	3	3	20	5	16
9	2	10	3	3	19	2	11
9	2	10	3	3	22	2	7
9	2	10	3	1	5	3	15
9	2	10	3	0	0	8	52
9	2	10	3	4	59	5	52
9	2	10	3	3	33	7	44
9	2	10	3	1	4	6	34
9	2	10	3	3	27	6	38
9	2	10	3	6	83	7	52
9	2	10	3	4	24	16	123
9	2	10	3	0	0	4	20
9	2	10	3	3	21	8	41
1	0	4	12	3	92	2	4
1	0	4	12	6	101	1	3
1	0	4	12	9	94	2	8
1	0	4	12	1	4	2	6
1	0	4	12	3	26	3	14
1	0	4	12	3	105	2	7
1	0	4	12	10	199	2	18
1	0	4	12	8	75	1	3
1	0	4	12	2	73	5	16
1	0	4	12	5	24	0	0
1	0	4	12	3	26	0	0
1	0	4	12	0	0	1	3
1	0	4	12	5	124	1	2
1	0	4	12	1	7	2	5
1	0	4	12	0	0	3	15
2	0	7	12	4	39	5	36
2	0	7	12	7	93	7	43
2	0	7	12	6	42	3	10
2	0	7	12	8	111	1	2
2	0	7	12	5	20	7	20
2	0	7	12	8	153	4	29
2	0	7	12	7	34	4	9
2	0	7	12	7	83	4	17
2	0	7	12	4	29	4	34
2	0	7	12	5	38	5	17
2	0	7	12	4	38	10	58
2	0	7	12	0	0	4	22
2	0	7	12	2	9	3	13
2	0	7	12	2	45	6	26
2	0	7	12	5	194	1	3
3	0	10	12	9	82	3	11
3	0	10	12	0	0	3	15
3	0	10	12	7	45	10	34
3	0	10	12	10	79	4	17
3	0	10	12	12	117	15	100
3	0	10	12	3	8	9	30
3	0	10	12	8	50	5	31
3	0	10	12	1	4	4	10
3	0	10	12	4	24	4	20
3	0	10	12	6	110	8	57
3	0	10	12	12	238	4	20
3	0	10	12	6	139	3	15
3	0	10	12	9	82	8	65
3	0	10	12	1	6	7	27
3	0	10	12	2	12	3	13
4	1	4	12	7	36	0	0
4	1	4	12	2	13	0	0
4	1	4	12	5	54	0	0
4	1	4	12	10	80	1	2
4	1	4	12	12	207	1	2
4	1	4	12	7	67	2	5
4	1	4	12	6	140	2	5
4	1	4	12	7	44	0	0
4	1	4	12	15	317	2	9
4	1	4	12	5	75	0	0
4	1	4	12	6	35	2	6
4	1	4	12	7	47	0	0
4	1	4	12	13	105	2	6
4	1	4	12	5	23	0	0
4	1	4	12	7	76	0	0
5	1	7	12	3	33	1	3
5	1	7	12	7	65	0	0
5	1	7	12	10	95	1	3
5	1	7	12	6	98	1	9
5	1	7	12	4	26	0	0
5	1	7	12	6	39	0	0
5	1	7	12	11	78	2	11
5	1	7	12	15	248	8	45
5	1	7	12	1	2	0	0
5	1	7	12	0	0	0	0
5	1	7	12	6	77	0	0
5	1	7	12	10	229	0	0
5	1	7	12	7	100	0	0
5	1	7	12	10	291	0	0
5	1	7	12	4	9	0	0
6	1	10	12	9	56	0	0
6	1	10	12	10	65	3	15
6	1	10	12	5	38	0	0
6	1	10	12	1	4	0	0
6	1	10	12	7	121	0	0
6	1	10	12	3	58	0	0
6	1	10	12	4	18	1	2
6	1	10	12	8	174	3	52
6	1	10	12	6	68	0	0
6	1	10	12	8	107	3	21
6	1	10	12	6	60	0	0
6	1	10	12	16	182	3	11
6	1	10	12	7	119	3	13
6	1	10	12	6	103	0	0
6	1	10	12	5	36	0	0
7	2	4	12	7	62	3	17
7	2	4	12	1	5	3	17
7	2	4	12	0	0	4	17
7	2	4	12	3	40	2	11
7	2	4	12	1	3	10	31
7	2	4	12	6	213	8	48
7	2	4	12	0	0	5	19
7	2	4	12	1	5	11	45
7	2	4	12	2	28	4	36
7	2	4	12	12	91	4	22
7	2	4	12	5	84	4	43
7	2	4	12	1	13	8	86
7	2	4	12	8	110	5	39
7	2	4	12	1	11	3	11
7	2	4	12	2	11	2	6
8	2	7	12	4	42	4	27
8	2	7	12	1	3	6	27
8	2	7	12	4	46	7	53
8	2	7	12	1	3	1	4
8	2	7	12	2	13	3	23
8	2	7	12	1	6	1	8
8	2	7	12	5	27	7	29
8	2	7	12	1	7	8	61
8	2	7	12	0	0	12	46
8	2	7	12	3	43	2	16
8	2	7	12	2	11	7	32
8	2	7	12	3	25	3	27
8	2	7	12	1	9	12	53
8	2	7	12	2	35	6	29
8	2	7	12	3	15	13	24
9	2	10	12	1	3	3	19
9	2	10	12	0	0	6	31
9	2	10	12	4	49	8	70
9	2	10	12	1	4	3	16
9	2	10	12	6	70	4	30
9	2	10	12	2	7	13	92
9	2	10	12	4	36	4	18
9	2	10	12	4	17	8	58
9	2	10	12	4	53	6	19
9	2	10	12	4	52	2	11
9	2	10	12	3	22	8	64
9	2	10	12	4	35	2	66
9	2	10	12	8	93	6	51
9	2	10	12	5	50	5	40
9	2	10	12	1	10	4	27
1	0	4	24	10	100	5	23
1	0	4	24	1	5	4	9
1	0	4	24	9	32	2	5
1	0	4	24	7	84	5	18
1	0	4	24	6	19	1	2
1	0	4	24	10	82	7	35
1	0	4	24	3	53	3	11
1	0	4	24	7	55	0	0
1	0	4	24	5	26	1	0
1	0	4	24	10	81	0	0
1	0	4	24	6	55	2	4
1	0	4	24	5	110	1	2
1	0	4	24	5	56	3	10
1	0	4	24	11	142	1	3
1	0	4	24	7	57	1	1
2	0	7	24	6	43	3	8
2	0	7	24	5	40	5	22
2	0	7	24	2	8	1	6
2	0	7	24	7	45	10	53
2	0	7	24	10	78	5	17
2	0	7	24	3	12	3	16
2	0	7	24	7	54	3	9
2	0	7	24	7	45	4	17
2	0	7	24	8	48	6	17
2	0	7	24	0	0	5	28
2	0	7	24	4	20	5	28
2	0	7	24	9	39	13	63
2	0	7	24	1	14	5	15
2	0	7	24	7	54	5	27
2	0	7	24	6	30	2	5
3	0	10	24	8	73	4	14
3	0	10	24	7	77	8	39
3	0	10	24	7	46	6	29
3	0	10	24	4	18	5	31
3	0	10	24	8	41	4	22
3	0	10	24	4	20	9	39
3	0	10	24	2	7	6	19
3	0	10	24	2	8	1	2
3	0	10	24	4	21	3	6
3	0	10	24	1	1	5	13
3	0	10	24	8	28	3	9
3	0	10	24	2	6	5	10
3	0	10	24	11	92	4	7
3	0	10	24	6	22	3	34
3	0	10	24	7	40	13	180
4	1	4	24	19	138	0	0
4	1	4	24	12	85	1	2
4	1	4	24	10	45	0	0
4	1	4	24	13	53	2	4
4	1	4	24	14	150	0	0
4	1	4	24	18	85	1	2
4	1	4	24	12	57	1	1
4	1	4	24	12	53	1	1
4	1	4	24	13	75	4	7
4	1	4	24	11	68	2	9
4	1	4	24	14	85	1	1
4	1	4	24	10	66	5	14
4	1	4	24	15	62	1	2
4	1	4	24	22	139	2	4
4	1	4	24	7	113	0	0
5	1	7	24	6	84	2	8
5	1	7	24	5	26	1	3
5	1	7	24	5	36	1	3
5	1	7	24	7	32	1	3
5	1	7	24	7	57	4	8
5	1	7	24	8	81	0	0
5	1	7	24	5	32	2	7
5	1	7	24	9	84	1	2
5	1	7	24	10	103	3	5
5	1	7	24	13	76	4	9
5	1	7	24	11	56	0	0
5	1	7	24	19	212	2	7
5	1	7	24	17	187	2	5
5	1	7	24	10	74	0	0
5	1	7	24	8	31	3	7
6	1	10	24	15	49	0	0
6	1	10	24	11	117	4	10
6	1	10	24	6	32	1	2
6	1	10	24	4	13	2	4
6	1	10	24	9	73	3	11
6	1	10	24	11	34	2	4
6	1	10	24	16	61	5	13
6	1	10	24	8	30	1	2
6	1	10	24	18	200	3	13
6	1	10	24	4	17	1	2
6	1	10	24	16	154	5	18
6	1	10	24	8	35	3	4
6	1	10	24	21	105	4	8
6	1	10	24	13	117	4	15
6	1	10	24	13	84	2	4
7	2	4	24	3	41	9	35
7	2	4	24	3	6	12	34
7	2	4	24	13	124	6	14
7	2	4	24	6	41	14	59
7	2	4	24	2	7	8	17
7	2	4	24	0	0	8	26
7	2	4	24	5	20	7	26
7	2	4	24	0	0	4	8
7	2	4	24	7	57	13	85
7	2	4	24	2	5	5	9
7	2	4	24	1	3	7	45
7	2	4	24	0	0	4	12
7	2	4	24	0	0	2	4
7	2	4	24	6	32	5	18
7	2	4	24	7	19	6	10
8	2	7	24	1	4	8	22
8	2	7	24	11	55	10	65
8	2	7	24	1	2	14	79
8	2	7	24	8	25	13	82
8	2	7	24	1	2	10	31
8	2	7	24	11	36	19	81
8	2	7	24	3	15	12	94
8	2	7	24	6	16	12	47
8	2	7	24	6	13	14	34
8	2	7	24	8	37	7	24
8	2	7	24	3	11	9	23
8	2	7	24	5	13	9	38
8	2	7	24	1	1	17	47
8	2	7	24	2	5	20	38
8	2	7	24	7	24	12	47
9	2	10	24	5	11	16	59
9	2	10	24	6	19	13	29
9	2	10	24	8	65	18	52
9	2	10	24	5	32	17	73
9	2	10	24	3	7	9	24
9	2	10	24	3	7	6	25
9	2	10	24	1	3	10	26
9	2	10	24	2	4	7	24
9	2	10	24	10	41	14	55
9	2	10	24	6	35	10	58
9	2	10	24	4	21	8	25
9	2	10	24	1	8	6	23
9	2	10	24	5	8	13	35
9	2	10	24	1	2	5	16
9	2	10	24	4	14	11	34

## Sheet: Describe statistics
Describe statistics
	sound	density	time	mean	standard deviation	n	mean	sem
pn	0	4	3	2.67	2.498	15	2.67	0.644981
			12	3.93	3.173	15	3.93	0.819265
			24	6.8	2.833	15	6.8	0.731477
			total	4.99	3.725	75	4.99	0.430126
		7	3	2.87	2.56	15	2.87	0.660989
			12	4.93	2.344	15	4.93	0.605218
			24	5.47	2.924	15	5.47	0.754974
			total	4.56	3.015	75	4.56	0.348142
		10	3	3.8	1.699	15	3.8	0.43868
			12	6	4.018	15	6	1.03744
			24	5.4	2.923	15	5.4	0.754715
			total	5.07	3.159	75	5.07	0.36477
		total	3	3.11	2.289	45	3.11	0.341224
			12	4.96	3.289	45	4.96	0.490295
			24	5.89	2.902	45	5.89	0.432605
			total	4.87	3.307	225	4.87	0.220467
	1	4	3	9.67	5.703	15	9.67	1.47251
			12	7.6	3.46	15	7.6	0.893368
			24	13.47	3.833	15	13.47	0.989676
			total	9.44	4.949	75	9.44	0.571461
		7	3	4.73	2.865	15	4.73	0.73974
			12	6.67	4.03	15	6.67	1.04054
			24	9.33	4.237	15	9.33	1.09399
			total	8.21	4.512	75	8.21	0.521001
		10	3	5.8	1.265	15	5.8	0.326622
			12	6.73	3.453	15	6.73	0.891561
			24	11.53	5.097	15	11.53	1.31604
			total	8.03	4.246	75	8.03	0.490286
		total	3	6.73	4.25	45	6.73	0.633553
			12	7	3.599	45	7	0.536507
			24	11.44	4.644	45	11.44	0.692287
			total	8.56	4.601	225	8.56	0.306733
	2	4	3	1.53	2.031	15	1.53	0.524402
			12	3.33	3.519	15	3.33	0.908602
			24	3.67	3.677	15	3.67	0.949397
			total	3.39	3.208	75	3.39	0.370428
		7	3	3.53	3.044	15	3.53	0.785957
			12	2.2	1.424	15	2.2	0.367675
			24	4.93	3.555	15	4.93	0.917897
			total	4.04	3.52	75	4.04	0.406455
		10	3	2.87	1.807	15	2.87	0.466565
			12	3.4	2.131	15	3.4	0.550222
			24	4.27	2.604	15	4.27	0.67235
			total	3.8	2.711	75	3.8	0.313039
		total	3	2.64	2.451	45	2.64	0.365374
			12	2.98	2.518	45	2.98	0.375361
			24	4.29	3.28	45	4.29	0.488954
			total	3.74	3.162	225	3.74	0.2108
	total	4	3	4.62	5.184	45	4.62	0.772785
			12	4.96	3.82	45	4.96	0.569452
			24	7.98	5.349	45	7.98	0.797382
			total	5.94	4.761	225	5.94	0.3174
		7	3	3.71	2.873	45	3.71	0.428282
			12	4.6	3.319	45	4.6	0.494767
			24	6.58	4.048	45	6.58	0.60344
			total	5.6	4.157	225	5.6	0.277133
		10	3	4.16	1.999	45	4.16	0.297993
			12	5.38	3.531	45	5.38	0.52637
			24	7.07	4.854	45	7.07	0.723592
			total	5.63	3.851	225	5.63	0.256733
		total	3	4.16	3.604	135	4.16	0.310183
			12	4.98	3.55	135	4.98	0.305535
			24	7.21	4.78	135	7.21	0.411397
			total	5.72	4.27	675	5.72	0.164352
pd	0	4	3	33.73	53.867	15	33.73	13.9084
			12	63.33	57.497	15	63.33	14.8457
			24	63.8	36.721	15	63.8	9.48132
			total	64.08	61.03	75	64.08	7.04714
		7	3	23.87	35.779	15	23.87	9.2381
			12	61.87	54.882	15	61.87	14.1705
			24	35.33	21.074	15	35.33	5.44128
			total	41.84	44.359	75	41.84	5.12214
		10	3	34.8	20.778	15	34.8	5.36486
			12	66.4	65.83	15	66.4	16.9972
			24	33.33	28.076	15	33.33	7.24919
			total	44.45	43.924	75	44.45	5.07191
		total	3	30.8	38.636	45	30.8	5.75951
			12	63.87	58.247	45	63.87	8.68295
			24	44.16	31.925	45	44.16	4.7591
			total	50.12	51.155	225	50.12	3.41033
	1	4	3	158.13	111.632	15	158.13	28.8233
			12	87.93	80.423	15	87.93	20.7651
			24	84.93	34.273	15	84.93	8.84925
			total	93.75	79.781	75	93.75	9.21232
		7	3	43.33	39.3	15	43.33	10.1472
			12	92.67	91.83	15	92.67	23.7104
			24	78.07	55.03	15	78.07	14.2087
			total	82.73	72.452	75	82.73	8.36604
		10	3	67.07	32.984	15	67.07	8.51643
			12	80.6	52.674	15	80.6	13.6004
			24	74.73	54.519	15	74.73	14.0767
			total	72.16	48.254	75	72.16	5.57189
		total	3	89.51	85.479	45	89.51	12.7425
			12	87.07	75.16	45	87.07	11.2042
			24	79.24	47.974	45	79.24	7.15154
			total	82.88	68.441	225	82.88	4.56273
	2	4	3	10.67	19.916	15	10.67	5.14229
			12	45.07	59.184	15	45.07	15.2812
			24	23.67	33.262	15	23.67	8.58821
			total	29.17	38.171	75	29.17	4.40761
		7	3	26.27	26.505	15	26.27	6.84356
			12	19	16.018	15	19	4.13583
			24	17.27	15.604	15	17.27	4.02894
			total	28.97	30.973	75	28.97	3.57645
		10	3	24.93	22.257	15	24.93	5.74673
			12	33.4	27.643	15	33.4	7.13739
			24	18.47	17.756	15	18.47	4.58458
			total	29.19	26.18	75	29.19	3.02301
		total	3	20.62	23.629	45	20.62	3.5224
			12	32.49	39.44	45	32.49	5.87937
			24	19.8	23.189	45	19.8	3.45681
			total	29.11	32.01	225	29.11	2.134
	total	4	3	67.51	96.461	45	67.51	14.3796
			12	65.44	67.378	45	65.44	10.0441
			24	57.47	42.605	45	57.47	6.35118
			total	62.33	67.187	225	62.33	4.47913
		7	3	31.16	34.628	45	31.16	5.16204
			12	57.84	68.238	45	57.84	10.1723
			24	43.56	42.977	45	43.56	6.40663
			total	51.18	56.822	225	51.18	3.78813
		10	3	42.27	31.181	45	42.27	4.64819
			12	60.13	53.895	45	60.13	8.03419
			24	42.18	43.319	45	42.18	6.45762
			total	48.6	44.168	225	48.6	2.94453
		total	3	46.98	63.256	135	46.98	5.44421
			12	61.14	63.116	135	61.14	5.43216
			24	47.73	43.206	135	47.73	3.71858
			total	54.04	57.072	675	54.04	2.1967
fn	0	4	3	0.73	0.704	15	0.73	0.181772
			12	1.8	1.265	15	1.8	0.326622
			24	2.4	2.063	15	2.4	0.532664
			total	1.83	1.781	75	1.83	0.205652
		7	3	2.93	2.314	15	2.93	0.597472
			12	4.53	2.326	15	4.53	0.600571
			24	5	3.024	15	5	0.780793
			total	4.16	2.702	75	4.16	0.312
		10	3	2.67	1.759	15	2.67	0.454172
			12	6	3.464	15	6	0.894401
			24	5.27	2.939	15	5.27	0.758847
			total	5.41	3.81	75	5.41	0.439941
		total	3	2.11	1.957	45	2.11	0.291732
			12	4.11	3.024	45	4.11	0.450791
			24	4.22	2.953	45	4.22	0.440207
			total	3.8	3.236	225	3.8	0.215733
	1	4	3	0.53	0.743	15	0.53	0.191842
			12	0.8	0.941	15	0.8	0.242965
			24	1.4	1.454	15	1.4	0.375421
			total	0.83	1.178	75	0.83	0.136024
		7	3	0.67	1.175	15	0.67	0.303384
			12	0.87	2.066	15	0.87	0.533439
			24	1.73	1.335	15	1.73	0.344696
			total	1.31	1.724	75	1.31	0.19907
		10	3	0.4	0.632	15	0.4	0.163182
			12	1.07	1.438	15	1.07	0.37129
			24	2.67	1.543	15	2.67	0.398401
			total	1.71	1.738	75	1.71	0.200687
		total	3	0.53	0.869	45	0.53	0.129543
			12	0.91	1.52	45	0.91	0.226588
			24	1.93	1.514	45	1.93	0.225694
			total	1.28	1.603	225	1.28	0.106867
	2	4	3	4.93	3.081	15	4.93	0.795511
			12	5.07	2.84	15	5.07	0.733285
			24	7.33	3.457	15	7.33	0.892594
			total	5.85	3.199	75	5.85	0.369389
		7	3	4.67	1.952	15	4.67	0.504004
			12	6.13	3.925	15	6.13	1.01343
			24	12.4	3.888	15	12.4	1.00388
			total	8.69	4.79	75	8.69	0.553102
		10	3	5.93	3.369	15	5.93	0.869872
			12	5.47	2.924	15	5.47	0.754974
			24	10.87	4.172	15	10.87	1.07721
			total	8.57	4.53	75	8.57	0.523079
		total	3	5.18	2.855	45	5.18	0.425598
			12	5.56	3.223	45	5.56	0.480456
			24	10.2	4.331	45	10.2	0.645627
			total	7.71	4.412	225	7.71	0.294133
	total	4	3	2.07	2.75	45	2.07	0.409946
			12	2.56	2.599	45	2.56	0.387436
			24	3.71	3.565	45	3.71	0.531439
			total	2.84	3.103	225	2.84	0.206867
		7	3	2.76	2.469	45	2.76	0.368057
			12	3.84	3.599	45	3.84	0.536507
			24	6.38	5.353	45	6.38	0.797978
			total	4.72	4.502	225	4.72	0.300133
		10	3	3	3.162	45	3	0.471363
			12	4.18	3.492	45	4.18	0.520557
			24	6.27	4.585	45	6.27	0.683491
			total	5.23	4.526	225	5.23	0.301733
		total	3	2.61	2.815	135	2.61	0.242277
			12	3.53	3.312	135	3.53	0.285052
			24	5.45	4.692	135	5.45	0.403823
			total	4.26	4.22	675	4.26	0.162428
fd	0	4	3	2.07	2.086	15	2.07	0.538603
			12	6.93	5.982	15	6.93	1.54455
			24	8.2	10.108	15	8.2	2.60987
			total	6.07	6.821	75	6.07	0.787621
		7	3	13.07	14.916	15	13.07	3.85129
			12	22.6	15.459	15	22.6	3.9915
			24	22.07	16.494	15	22.07	4.25873
			total	18.57	17.993	75	18.57	2.07765
		10	3	12.73	10.471	15	12.73	2.7036
			12	31	24.977	15	31	6.44903
			24	30.27	43.21	15	30.27	11.1568
			total	29.88	45.587	75	29.88	5.26393
		total	3	9.29	11.565	45	9.29	1.72401
			12	20.18	19.689	45	20.18	2.93506
			24	20.18	28.248	45	20.18	4.21096
			total	18.17	30.065	225	18.17	2.00433
	1	4	3	1.8	2.426	15	1.8	0.626391
			12	2.33	3.039	15	2.33	0.784666
			24	3.13	4.015	15	3.13	1.03667
			total	2.15	3.471	75	2.15	0.400797
		7	3	1.87	3.182	15	1.87	0.821589
			12	4.73	11.677	15	4.73	3.01499
			24	4.47	3.137	15	4.47	0.80997
			total	3.81	6.546	75	3.81	0.755867
		10	3	1.47	2.326	15	1.47	0.600571
			12	7.6	14.136	15	7.6	3.6499
			24	7.33	5.615	15	7.33	1.44979
			total	5.91	8.919	75	5.91	1.02988
		total	3	1.71	2.617	45	1.71	0.390119
			12	4.89	10.707	45	4.89	1.59611
			24	4.98	4.629	45	4.98	0.690051
			total	3.96	6.841	225	3.96	0.456067
	2	4	3	22.07	23.107	15	22.07	5.9662
			12	29.87	20.636	15	29.87	5.32819
			24	26.8	22.207	15	26.8	5.73382
			total	26.99	20.608	75	26.99	2.37961
		7	3	25.87	15.24	15	25.87	3.93495
			12	30.6	16.352	15	30.6	4.22207
			24	50.13	24.065	15	50.13	6.21356
			total	38.63	21.666	75	38.63	2.50177
		10	3	36.47	28.613	15	36.47	7.38784
			12	40.8	24.53	15	40.8	6.33362
			24	37.2	17.383	15	37.2	4.48827
			total	45.45	28.324	75	45.45	3.27057
		total	3	28.13	23.286	45	28.13	3.47127
			12	33.76	20.917	45	33.76	3.11812
			24	38.04	23.033	45	38.04	3.43356
			total	37.02	24.875	225	37.02	1.65833
	total	4	3	8.64	16.287	45	8.64	2.42792
			12	13.04	17.267	45	13.04	2.57401
			24	12.71	17.333	45	12.71	2.58385
			total	11.73	16.705	225	11.73	1.11367
		7	3	13.6	15.692	45	13.6	2.33923
			12	19.31	18.002	45	19.31	2.68358
			24	25.56	25.212	45	25.56	3.75838
			total	20.34	21.924	225	20.34	1.4616
		10	3	16.89	22.688	45	16.89	3.38213
			12	26.47	25.533	45	26.47	3.80623
			24	24.93	29.442	45	24.93	4.38895
			total	27.08	35.265	225	27.08	2.351
		total	3	13.04	18.67	135	13.04	1.60686
			12	19.61	21.182	135	19.61	1.82306
			24	21.07	25.045	135	21.07	2.15553
			total	19.72	26.557	675	19.72	1.02218

## Sheet: Preening-GLMM(Normal)
3d pn
Fixed effecta
source	F	free degree 1	free degree 2	significance			Paired comparison										Paired comparison
Revise the model	10.473	8	126	0			sound Paired comparison	Comparative estimation	Standard error	t	free degree	Adj.significance	95% confidence interval				density Paired comparison	Comparative estimation	Standard error	t	free degree	Adj.significance	95% confidence interval
sound	27.172	2	126	0									lower limit	upper limit									lower limit	upper limit
density	1.126	2	126	0.328			0 - 1	-3.622	0.607	-5.965	126	2.304e-08	-4.824	-2.421			4~7	0.911	0.607	1.5	126	0.136	-0.291	2.113
sound * density	6.796	4	126	0			0 - 2	0.467	0.607	0.769	126	0.444	-0.735	1.668			4~10	0.467	0.607	0.769	126	0.444	-0.735	1.668
Probability distribution: Normal							1 - 0	3.622	0.607	5.965	126	2.304e-08	2.421	4.824			7~4	-0.911	0.607	-1.5	126	0.136	-2.113	0.291
Correlation function: identity equation							1~2	4.089	0.607	6.734	126	5.253e-10	2.887	5.291			7~10	-0.444	0.607	-0.732	126	0.466	-1.646	0.757
a target：pn							2 - 0	-0.467	0.607	-0.769	126	0.444	-1.668	0.735			10~4	-0.467	0.607	-0.769	126	0.444	-1.668	0.735
							2~1	-4.089	0.607	-6.734	126	5.253e-10	-5.291	-2.887			10~7	0.444	0.607	0.732	126	0.466	-0.757	1.646
							The adjusted significance level for the minimum significance difference is. 05.										The adjusted significance level for the minimum significance difference is. 05.
							Paired comparison										Paired comparison
							density	sound Paired comparison	Comparative estimation	Standard error	t	free degree	Adj.significance	95% confidence interval			sound	density Paired comparison	Comparative estimation	Standard error	t	free degree	Adj.significance	95% confidence interval
														lower limit	upper limit									lower limit	upper limit
							4	0 - 1	-7	1.052	-6.656	126	7.789e-10	-9.081	-4.919		0	4~7	-0.2	1.052	-0.19	126	0.849	-2.281	1.881
								0 - 2	1.133	1.052	1.078	126	0.283	-0.948	3.215			4~10	-1.133	1.052	-1.078	126	0.283	-3.215	0.948
								1 - 0	7	1.052	6.656	126	7.789e-10	4.919	9.081			7~4	0.2	1.052	0.19	126	0.849	-1.881	2.281
								1~2	8.133	1.052	7.733	126	2.907e-12	6.052	10.215			7~10	-0.933	1.052	-0.887	126	0.377	-3.015	1.148
								2 - 0	-1.133	1.052	-1.078	126	0.283	-3.215	0.948			10~4	1.133	1.052	1.078	126	0.283	-0.948	3.215
								2~1	-8.133	1.052	-7.733	126	2.907e-12	-10.215	-6.052			10~7	0.933	1.052	0.887	126	0.377	-1.148	3.015
							7	0 - 1	-1.867	1.052	-1.775	126	0.078	-3.948	0.215		1	4~7	4.933	1.052	4.691	126	6.977e-06	2.852	7.015
								0 - 2	-0.667	1.052	-0.634	126	0.527	-2.748	1.415			4~10	3.867	1.052	3.676	126	0	1.785	5.948
								1 - 0	1.867	1.052	1.775	126	0.078	-0.215	3.948			7~4	-4.933	1.052	-4.691	126	6.977e-06	-7.015	-2.852
								1~2	1.2	1.052	1.141	126	0.256	-0.881	3.281			7~10	-1.067	1.052	-1.014	126	0.312	-3.148	1.015
								2 - 0	0.667	1.052	0.634	126	0.527	-1.415	2.748			10~4	-3.867	1.052	-3.676	126	0	-5.948	-1.785
								2~1	-1.2	1.052	-1.141	126	0.256	-3.281	0.881			10~7	1.067	1.052	1.014	126	0.312	-1.015	3.148
							10	0 - 1	-2	1.052	-1.902	126	0.06	-4.081	0.081		2	4~7	-2	1.052	-1.902	126	0.06	-4.081	0.081
								0 - 2	0.933	1.052	0.887	126	0.377	-1.148	3.015			4~10	-1.333	1.052	-1.268	126	0.207	-3.415	0.748
								1 - 0	2	1.052	1.902	126	0.06	-0.081	4.081			7~4	2	1.052	1.902	126	0.06	-0.081	4.081
								1~2	2.933	1.052	2.789	126	0.006	0.852	5.015			7~10	0.667	1.052	0.634	126	0.527	-1.415	2.748
								2 - 0	-0.933	1.052	-0.887	126	0.377	-3.015	1.148			10~4	1.333	1.052	1.268	126	0.207	-0.748	3.415
								2~1	-2.933	1.052	-2.789	126	0.006	-5.015	-0.852			10~7	-0.667	1.052	-0.634	126	0.527	-2.748	1.415
							The adjusted significance level for the minimum significance difference is. 05.										The adjusted significance level for the minimum significance difference is. 05.
							Overall inspection results										Overall inspection results
							density	F	free degree 1	free degree 2	significance						sound	F	free degree 1	free degree 2	significance
							4	35.087	2	126	7.709e-13						0	0.662	2	126	0.518
							7	1.618	2	126	0.202						1	12.182	2	126	1.456e-05
							10	4.061	2	126	0.02						2	1.875	2	126	0.158
3d pd
Fixed effecta							LSD																					Bonferroni
source	F	free degree 1	free degree 2	significance			Paired comparison										Paired comparison											Paired comparison										Paired comparison
Revise the model	12.567	8	126	0			sound Paired comparison	Comparative estimation	Standard error	t	free degree	Adj.significance	95% confidence interval				density Paired comparison	Comparative estimation	Standard error	t	free degree	Adj.significance	95% confidence interval					sound Paired comparison	Comparative estimation	Standard error	t	free degree	Adj.significance	95% confidence interval				density Paired comparison	Comparative estimation	Standard error	t	free degree	Adj.significance	95% confidence interval
sound	26.288	2	126	0									lower limit	upper limit									lower limit	upper limit										lower limit	upper limit									lower limit	upper limit
density	6.599	2	126	0.002			0 - 1	-58.711	10.257	-5.724	126	7.19e-08	-79.008	-38.414			4~7	36.356	10.257	3.545	126	0.001	16.058	56.653				0 - 1	-58.711	10.257	-5.724	126	1.438e-07	-81.978	-35.444			4~7	36.356	10.257	3.545	126	0.002	11.47	61.242
sound * density	8.69	4	126	0			0 - 2	10.178	10.257	0.992	126	0.323	-10.12	30.475			4~10	25.244	10.257	2.461	126	0.015	4.947	45.542				0 - 2	10.178	10.257	0.992	126	0.323	-10.12	30.475			4~10	25.244	10.257	2.461	126	0.03	1.978	48.511
Probability distribution: Normal							1 - 0	58.711	10.257	5.724	126	7.19e-08	38.414	79.008			7~4	-36.356	10.257	-3.545	126	0.001	-56.653	-16.058				1 - 0	58.711	10.257	5.724	126	1.438e-07	35.444	81.978			7~4	-36.356	10.257	-3.545	126	0.002	-61.242	-11.47
Correlation function: identity equation							1~2	68.889	10.257	6.717	126	5.727e-10	48.592	89.186			7~10	-11.111	10.257	-1.083	126	0.281	-31.408	9.186				1~2	68.889	10.257	6.717	126	1.718e-09	44.003	93.775			7~10	-11.111	10.257	-1.083	126	0.281	-31.408	9.186
a target：pd							2 - 0	-10.178	10.257	-0.992	126	0.323	-30.475	10.12			10~4	-25.244	10.257	-2.461	126	0.015	-45.542	-4.947				2 - 0	-10.178	10.257	-0.992	126	0.323	-30.475	10.12			10~4	-25.244	10.257	-2.461	126	0.03	-48.511	-1.978
							2~1	-68.889	10.257	-6.717	126	5.727e-10	-89.186	-48.592			10~7	11.111	10.257	1.083	126	0.281	-9.186	31.408				2~1	-68.889	10.257	-6.717	126	1.718e-09	-93.775	-44.003			10~7	11.111	10.257	1.083	126	0.281	-9.186	31.408
							The adjusted significance level for the minimum significance difference is. 05.										The adjusted significance level for the minimum significance difference is. 05.											The significance level after adjusting for sequential Bonferroni is. 05.										The significance level after adjusting for sequential Bonferroni is. 05.
																												The confidence interval limit is an approximate value.										The confidence interval limit is an approximate value.
							Paired comparison										Paired comparison											Paired comparison										Paired comparison
							density	sound Paired comparison	Comparative estimation	Standard error	t	free degree	Adj.significance	95% confidence interval			sound	density Paired comparison	Comparative estimation	Standard error	t	free degree	Adj.significance	95% confidence interval				density	sound Paired comparison	Comparative estimation	Standard error	t	free degree	Adj.significance	95% confidence interval			sound	density Paired comparison	Comparative estimation	Standard error	t	free degree	Adj.significance	95% confidence interval
														lower limit	upper limit									lower limit	upper limit										lower limit	upper limit									lower limit	upper limit
							4	0 - 1	-124.4	17.765	-7.003	126	1.334e-10	-159.556	-89.244		0	4~7	9.867	17.765	0.555	126	0.58	-25.289	45.023			4	0 - 1	-124.4	17.765	-7.003	126	2.668e-10	-164.699	-84.101		0	4~7	9.867	17.765	0.555	126	1	-29.376	49.11
								0 - 2	23.067	17.765	1.298	126	0.197	-12.089	58.223			4~10	-1.067	17.765	-0.06	126	0.952	-36.223	34.089				0 - 2	23.067	17.765	1.298	126	0.197	-12.089	58.223			4~10	-1.067	17.765	-0.06	126	1	-36.603	34.469
								1 - 0	124.4	17.765	7.003	126	1.334e-10	89.244	159.556			7~4	-9.867	17.765	-0.555	126	0.58	-45.023	25.289				1 - 0	124.4	17.765	7.003	126	2.668e-10	84.101	164.699			7~4	-9.867	17.765	-0.555	126	1	-49.11	29.376
								1~2	147.467	17.765	8.301	126	1.363e-13	112.311	182.623			7~10	-10.933	17.765	-0.615	126	0.539	-46.089	24.223				1~2	147.467	17.765	8.301	126	4.09e-13	104.363	190.57			7~10	-10.933	17.765	-0.615	126	1	-54.037	32.17
								2 - 0	-23.067	17.765	-1.298	126	0.197	-58.223	12.089			10~4	1.067	17.765	0.06	126	0.952	-34.089	36.223				2 - 0	-23.067	17.765	-1.298	126	0.197	-58.223	12.089			10~4	1.067	17.765	0.06	126	1	-34.469	36.603
								2~1	-147.467	17.765	-8.301	126	1.363e-13	-182.623	-112.311			10~7	10.933	17.765	0.615	126	0.539	-24.223	46.089				2~1	-147.467	17.765	-8.301	126	4.09e-13	-190.57	-104.363			10~7	10.933	17.765	0.615	126	1	-32.17	54.037
							7	0 - 1	-19.467	17.765	-1.096	126	0.275	-54.623	15.689		1	4~7	114.8	17.765	6.462	126	2.047e-09	79.644	149.956			7	0 - 1	-19.467	17.765	-1.096	126	0.826	-62.57	23.637		1	4~7	114.8	17.765	6.462	126	6.14e-09	71.696	157.904
								0 - 2	-2.4	17.765	-0.135	126	0.893	-37.556	32.756			4~10	91.067	17.765	5.126	126	1.083e-06	55.911	126.223				0 - 2	-2.4	17.765	-0.135	126	0.893	-37.556	32.756			4~10	91.067	17.765	5.126	126	2.166e-06	50.767	131.366
								1 - 0	19.467	17.765	1.096	126	0.275	-15.689	54.623			7~4	-114.8	17.765	-6.462	126	2.047e-09	-149.956	-79.644				1 - 0	19.467	17.765	1.096	126	0.826	-23.637	62.57			7~4	-114.8	17.765	-6.462	126	6.14e-09	-157.904	-71.696
								1~2	17.067	17.765	0.961	126	0.339	-18.089	52.223			7~10	-23.733	17.765	-1.336	126	0.184	-58.889	11.423				1~2	17.067	17.765	0.961	126	0.826	-24.623	58.756			7~10	-23.733	17.765	-1.336	126	0.184	-58.889	11.423
								2 - 0	2.4	17.765	0.135	126	0.893	-32.756	37.556			10~4	-91.067	17.765	-5.126	126	1.083e-06	-126.223	-55.911				2 - 0	2.4	17.765	0.135	126	0.893	-32.756	37.556			10~4	-91.067	17.765	-5.126	126	2.166e-06	-131.366	-50.767
								2~1	-17.067	17.765	-0.961	126	0.339	-52.223	18.089			10~7	23.733	17.765	1.336	126	0.184	-11.423	58.889				2~1	-17.067	17.765	-0.961	126	0.826	-58.756	24.623			10~7	23.733	17.765	1.336	126	0.184	-11.423	58.889
							10	0 - 1	-32.267	17.765	-1.816	126	0.072	-67.423	2.889		2	4~7	-15.6	17.765	-0.878	126	0.382	-50.756	19.556			10	0 - 1	-32.267	17.765	-1.816	126	0.143	-72.566	8.033		2	4~7	-15.6	17.765	-0.878	126	1	-58.704	27.504
								0 - 2	9.867	17.765	0.555	126	0.58	-25.289	45.023			4~10	-14.267	17.765	-0.803	126	0.423	-49.423	20.889				0 - 2	9.867	17.765	0.555	126	0.58	-25.289	45.023			4~10	-14.267	17.765	-0.803	126	1	-55.732	27.199
								1 - 0	32.267	17.765	1.816	126	0.072	-2.889	67.423			7~4	15.6	17.765	0.878	126	0.382	-19.556	50.756				1 - 0	32.267	17.765	1.816	126	0.143	-8.033	72.566			7~4	15.6	17.765	0.878	126	1	-27.504	58.704
								1~2	42.133	17.765	2.372	126	0.019	6.977	77.289			7~10	1.333	17.765	0.075	126	0.94	-33.823	36.489				1~2	42.133	17.765	2.372	126	0.058	-0.97	85.237			7~10	1.333	17.765	0.075	126	1	-34.3	36.967
								2 - 0	-9.867	17.765	-0.555	126	0.58	-45.023	25.289			10~4	14.267	17.765	0.803	126	0.423	-20.889	49.423				2 - 0	-9.867	17.765	-0.555	126	0.58	-45.023	25.289			10~4	14.267	17.765	0.803	126	1	-27.199	55.732
								2~1	-42.133	17.765	-2.372	126	0.019	-77.289	-6.977			10~7	-1.333	17.765	-0.075	126	0.94	-36.489	33.823				2~1	-42.133	17.765	-2.372	126	0.058	-85.237	0.97			10~7	-1.333	17.765	-0.075	126	1	-36.967	34.3
							The adjusted significance level for the minimum significance difference is. 05.										The adjusted significance level for the minimum significance difference is. 05.											The significance level after adjusting for sequential Bonferroni is. 05.										The significance level after adjusting for sequential Bonferroni is. 05.
																												The confidence interval limit is an approximate value.										The confidence interval limit is an approximate value.
							Overall inspection results				pd						Overall inspection results											Overall inspection results				pd						Overall inspection results
							density	F	free degree 1	free degree 2	significance						sound	F	free degree 1	free degree 2	significance							density	F	free degree 1	free degree 2	significance						sound	F	free degree 1	free degree 2	significance
							4	39.877	2	126	3.819e-14						0	0.23	2	126	0.795							4	39.877	2	126	3.819e-14						0	0.23	2	126	0.795
							7	0.714	2	126	0.492						1	23.275	2	126	2.5e-09							7	0.714	2	126	0.492						1	23.275	2	126	2.5e-09
							10	3.078	2	126	0.05						2	0.474	2	126	0.624							10	3.078	2	126	0.05						2	0.474	2	126	0.624
12d pn
Fixed effecta							Paired comparison										Paired comparison
source	F	free degree 1	free degree 2	significance			sound Paired comparison	Comparative estimation	Standard error	t	free degree	Adj.significance	95% confidence interval				density Paired comparison	Comparative estimation	Standard error	t	free degree	Adj.significance	95% confidence interval
Revise the model	5.178	8	126	0									lower limit	upper limit									lower limit	upper limit
sound	18.044	2	126	0			0 - 1	-2.044	0.67	-3.053	126	0.003	-3.37	-0.719			4~7	0.356	0.67	0.531	126	0.596	-0.97	1.681
density	0.676	2	126	0.51			0 - 2	1.978	0.67	2.954	126	0.004	0.653	3.303			4~10	-0.422	0.67	-0.631	126	0.529	-1.747	0.903
sound * density	0.996	4	126	0.413			1 - 0	2.044	0.67	3.053	126	0.003	0.719	3.37			7~4	-0.356	0.67	-0.531	126	0.596	-1.681	0.97
Probability distribution: Normal							1~2	4.022	0.67	6.007	126	1.886e-08	2.697	5.347			7~10	-0.778	0.67	-1.162	126	0.248	-2.103	0.547
Correlation function: identity equation							2 - 0	-1.978	0.67	-2.954	126	0.004	-3.303	-0.653			10~4	0.422	0.67	0.631	126	0.529	-0.903	1.747
a target：pn							2~1	-4.022	0.67	-6.007	126	1.886e-08	-5.347	-2.697			10~7	0.778	0.67	1.162	126	0.248	-0.547	2.103
							The adjusted significance level for the minimum significance difference is. 05.										The adjusted significance level for the minimum significance difference is. 05.
12d pd
Fixed effecta							LSD																				Bonferroni
source	F	free degree 1	free degree 2	significance			Paired comparison										Paired comparison										Paired comparison									Paired comparison
Revise the model	2.531	8	126	0.014			sound Paired comparison	Comparative estimation	Standard error	t	free degree	Adj.significance	95% confidence interval				sound Paired comparison	Comparative estimation	Standard error	t	free degree	Adj.significance	95% confidence interval				sound Paired comparison	Comparative estimation	Standard error	t	free degree	Adj.significance	95% confidence interval			density Paired comparison	Comparative estimation	Standard error	t	free degree	Adj.significance	95% confidence interval
sound	9.25	2	126	0									lower limit	upper limit									lower limit	upper limit									lower limit	upper limit								lower limit	upper limit
density	0.187	2	126	0.829			0 - 1	-23.2	12.737	-1.822	126	0.071	-48.405	2.005			0 - 1	-23.2	12.737	-1.822	126	0.071	-48.405	2.005			0 - 1	-23.2	12.737	-1.822	126	0.071	-48.405	2.005		4~7	7.6	12.737	0.597	126	1	-23.304	38.504
sound * density	0.344	4	126	0.848			0 - 2	31.378	12.737	2.464	126	0.015	6.172	56.583			0 - 2	31.378	12.737	2.464	126	0.015	6.172	56.583			0 - 2	31.378	12.737	2.464	126	0.03	2.485	60.271		4~10	5.311	12.737	0.417	126	1	-22.009	32.632
Probability distribution: Normal							1 - 0	23.2	12.737	1.822	126	0.071	-2.005	48.405			1 - 0	23.2	12.737	1.822	126	0.071	-2.005	48.405			1 - 0	23.2	12.737	1.822	126	0.071	-2.005	48.405		7~4	-7.6	12.737	-0.597	126	1	-38.504	23.304
Correlation function: identity equation							1~2	54.578	12.737	4.285	126	3.595e-05	29.372	79.783			1~2	54.578	12.737	4.285	126	3.595e-05	29.372	79.783			1~2	54.578	12.737	4.285	126	0	23.674	85.481		7~10	-2.289	12.737	-0.18	126	1	-28.342	23.764
a target：pd							2 - 0	-31.378	12.737	-2.464	126	0.015	-56.583	-6.172			2 - 0	-31.378	12.737	-2.464	126	0.015	-56.583	-6.172			2 - 0	-31.378	12.737	-2.464	126	0.03	-60.271	-2.485		10~4	-5.311	12.737	-0.417	126	1	-32.632	22.009
							2~1	-54.578	12.737	-4.285	126	3.595e-05	-79.783	-29.372			2~1	-54.578	12.737	-4.285	126	3.595e-05	-79.783	-29.372			2~1	-54.578	12.737	-4.285	126	0	-85.481	-23.674		10~7	2.289	12.737	0.18	126	1	-23.764	28.342
							The adjusted significance level for the minimum significance difference is. 05.										The adjusted significance level for the minimum significance difference is. 05.										The significance level after adjusting for sequential Bonferroni is. 05.									The significance level after adjusting for sequential Bonferroni is. 05.
																											The confidence interval limit is an approximate value.									The confidence interval limit is an approximate value.
24d pn
Fixed effecta							Paired comparison										Paired comparison
source	F	free degree 1	free degree 2	significance			sound Paired comparison	Comparative estimation	Standard error	t	free degree	Adj.significance	95% confidence interval				density Paired comparison	Comparative estimation	Standard error	t	free degree	Adj.significance	95% confidence interval
Revise the model	13.771	8	126	0									lower limit	upper limit									lower limit	upper limit
sound	48.95	2	126	0			0 - 1	-5.556	0.759	-7.318	126	2.596e-11	-7.058	-4.053			4~7	1.4	0.759	1.844	126	0.067	-0.102	2.902
density	1.752	2	126	0.178			0 - 2	1.6	0.759	2.108	126	0.037	0.098	3.102			4~10	0.911	0.759	1.2	126	0.232	-0.591	2.413
sound * density	2.191	4	126	0.074			1 - 0	5.556	0.759	7.318	126	2.596e-11	4.053	7.058			7~4	-1.4	0.759	-1.844	126	0.067	-2.902	0.102
Probability distribution: Normal							1~2	7.156	0.759	9.426	126	2.22e-16	5.653	8.658			7~10	-0.489	0.759	-0.644	126	0.521	-1.991	1.013
Correlation function: identity equation							2 - 0	-1.6	0.759	-2.108	126	0.037	-3.102	-0.098			10~4	-0.911	0.759	-1.2	126	0.232	-2.413	0.591
a target：pn							2~1	-7.156	0.759	-9.426	126	2.22e-16	-8.658	-5.653			10~7	0.489	0.759	0.644	126	0.521	-1.013	1.991
							The adjusted significance level for the minimum significance difference is. 05.										The adjusted significance level for the minimum significance difference is. 05.
24d pd
Fixed effecta							LSD																				Bonferroni
source	F	free degree 1	free degree 2	significance			Paired comparison										Paired comparison										Paired comparison									Paired comparison
Revise the model	8.889	8	126	0			sound Paired comparison	Comparative estimation	Standard error	t	free degree	Adj.significance	95% confidence interval				density Paired comparison	Comparative estimation	Standard error	t	free degree	Adj.significance	95% confidence interval				sound Paired comparison	Comparative estimation	Standard error	t	free degree	Adj.significance	95% confidence interval			density Paired comparison	Comparative estimation	Standard error	t	free degree	Adj.significance	95% confidence interval
sound	31.666	2	126	0									lower limit	upper limit									lower limit	upper limit									lower limit	upper limit								lower limit	upper limit
density	2.536	2	126	0.083			0 - 1	-35.089	7.51	-4.672	126	7.53e-06	-49.951	-20.227			4~7	13.911	7.51	1.852	126	0.066	-0.951	28.773			0 - 1	-35.089	7.51	-4.672	126	1.506e-05	-52.126	-18.052		4~7	13.911	7.51	1.852	126	0.133	-3.126	30.948
sound * density	0.677	4	126	0.609			0 - 2	24.356	7.51	3.243	126	0.002	9.493	39.218			4~10	15.289	7.51	2.036	126	0.044	0.427	30.151			0 - 2	24.356	7.51	3.243	126	0.002	9.493	39.218		4~10	15.289	7.51	2.036	126	0.132	-2.933	33.511
Probability distribution: Normal							1 - 0	35.089	7.51	4.672	126	7.53e-06	20.227	49.951			7~4	-13.911	7.51	-1.852	126	0.066	-28.773	0.951			1 - 0	35.089	7.51	4.672	126	1.506e-05	18.052	52.126		7~4	-13.911	7.51	-1.852	126	0.133	-30.948	3.126
Correlation function: identity equation							1~2	59.444	7.51	7.915	126	1.098e-12	44.582	74.307			7~10	1.378	7.51	0.183	126	0.855	-13.484	16.24			1~2	59.444	7.51	7.915	126	3.293e-12	41.222	77.667		7~10	1.378	7.51	0.183	126	0.855	-13.484	16.24
a target：pd							2 - 0	-24.356	7.51	-3.243	126	0.002	-39.218	-9.493			10~4	-15.289	7.51	-2.036	126	0.044	-30.151	-0.427			2 - 0	-24.356	7.51	-3.243	126	0.002	-39.218	-9.493		10~4	-15.289	7.51	-2.036	126	0.132	-33.511	2.933
							2~1	-59.444	7.51	-7.915	126	1.098e-12	-74.307	-44.582			10~7	-1.378	7.51	-0.183	126	0.855	-16.24	13.484			2~1	-59.444	7.51	-7.915	126	3.293e-12	-77.667	-41.222		10~7	-1.378	7.51	-0.183	126	0.855	-16.24	13.484
							The adjusted significance level for the minimum significance difference is. 05.										The adjusted significance level for the minimum significance difference is. 05.										The significance level after adjusting for sequential Bonferroni is. 05.									The significance level after adjusting for sequential Bonferroni is. 05.
																											The confidence interval limit is an approximate value.									The confidence interval limit is an approximate value.

## Sheet: Preening-GLMM(Poisson)
3d pn
Fixed effect a							Paired comparison										Paired comparison
source	F	free degree 1	free degree 2	significance			sound Paired comparison	Comparative estimation	Standard error	t	free degree	Adj.significance	95% confidence interval				density Paired comparison	Comparative estimation	Standard error	t	free degree	Adj.significance	95% confidence interval
Revise the model	8.696	8	126	0									lower limit	upper limit									lower limit	upper limit
sound	24.505	2	126	0			0 - 1	-3.239	0.644	-5.028	126	3.325e-06	-4.7	-1.777			4~7	-0.238	0.527	-0.452	126	0.866	-1.346	0.87
density	0.758	2	126	0.471			0 - 2	0.571	0.441	1.293	126	0.198	-0.303	1.444			4~10	-0.666	0.551	-1.208	126	0.687	-2.002	0.671
sound * density	4.925	4	126	0.001			1 - 0	3.239	0.644	5.028	126	3.325e-06	1.777	4.7			7~4	0.238	0.527	0.452	126	0.866	-0.87	1.346
Probability distribution: Poisson							1~2	3.809	0.626	6.083	126	3.936e-08	2.29	5.329			7~10	-0.427	0.543	-0.786	126	0.866	-1.659	0.805
Correlation function: logarithmic a							2 - 0	-0.571	0.441	-1.293	126	0.198	-1.444	0.303			10~4	0.666	0.551	1.208	126	0.687	-0.671	2.002
a target：pn							2~1	-3.809	0.626	-6.083	126	3.936e-08	-5.329	-2.29			10~7	0.427	0.543	0.786	126	0.866	-0.805	1.659
							The significance level after adjusting for sequential Bonferroni is. 05.										The significance level after adjusting for sequential Bonferroni is. 05.
							The confidence interval limit is an approximate value.										The confidence interval limit is an approximate value.
							Paired comparison										Paired comparison
							density	sound Paired comparison	Comparative estimation	Standard error	t	free degree	Adj.significance	95% confidence interval			sound	density Paired comparison	Comparative estimation	Standard error	t	free degree	Adj.significance	95% confidence interval
														lower limit	upper limit									lower limit	upper limit
							4	0 - 1	-6.544	1.371	-4.773	126	9.907e-06	-9.654	-3.433		0	4~7	-0.193	0.747	-0.259	126	0.796	-1.672	1.285
								0 - 2	1.091	0.634	1.722	126	0.087	-0.163	2.345			4~10	-1.174	0.839	-1.398	126	0.493	-3.211	0.863
								1 - 0	6.544	1.371	4.773	126	9.907e-06	3.433	9.654			7~4	0.193	0.747	0.259	126	0.796	-1.285	1.672
								1~2	7.635	1.322	5.773	126	1.717e-07	4.426	10.844			7~10	-0.981	0.855	-1.147	126	0.507	-2.92	0.959
								2 - 0	-1.091	0.634	-1.722	126	0.087	-2.345	0.163			10~4	1.174	0.839	1.398	126	0.493	-0.863	3.211
								2~1	-7.635	1.322	-5.773	126	1.717e-07	-10.844	-4.426			10~7	0.981	0.855	1.147	126	0.507	-0.959	2.92
							7	0 - 1	-1.826	0.934	-1.956	126	0.158	-4.092	0.439		1	4~7	4.524	1.481	3.055	126	0.008	0.931	8.117
								0 - 2	-0.62	0.82	-0.756	126	0.451	-2.244	1.003			4~10	3.352	1.555	2.156	126	0.066	-0.175	6.879
								1 - 0	1.826	0.934	1.956	126	0.158	-0.439	4.092			7~4	-4.524	1.481	-3.055	126	0.008	-8.117	-0.931
								1~2	1.206	0.98	1.23	126	0.442	-1.017	3.429			7~10	-1.172	1.176	-0.997	126	0.321	-3.5	1.155
								2 - 0	0.62	0.82	0.756	126	0.451	-1.003	2.244			10~4	-3.352	1.555	-2.156	126	0.066	-6.879	0.175
								2~1	-1.206	0.98	-1.23	126	0.442	-3.429	1.017			10~7	1.172	1.176	0.997	126	0.321	-1.155	3.5
							10	0 - 1	-2.018	1.115	-1.81	126	0.145	-4.546	0.511		2	4~7	-1.905	0.718	-2.652	126	0.027	-3.648	-0.162
								0 - 2	0.934	0.859	1.088	126	0.279	-0.766	2.635			4~10	-1.331	0.659	-2.018	126	0.091	-2.826	0.165
								1 - 0	2.018	1.115	1.81	126	0.145	-0.511	4.546			7~4	1.905	0.718	2.652	126	0.027	0.162	3.648
								1~2	2.952	1.05	2.81	126	0.017	0.403	5.501			7~10	0.574	0.825	0.696	126	0.488	-1.058	2.207
								2 - 0	-0.934	0.859	-1.088	126	0.279	-2.635	0.766			10~4	1.331	0.659	2.018	126	0.091	-0.165	2.826
								2~1	-2.952	1.05	-2.81	126	0.017	-5.501	-0.403			10~7	-0.574	0.825	-0.696	126	0.488	-2.207	1.058
							The significance level after adjusting for sequential Bonferroni is. 05.										The significance level after adjusting for sequential Bonferroni is. 05.
							The confidence interval limit is an approximate value.										The confidence interval limit is an approximate value.
							Overall inspection results										Overall inspection results
							density	F	free degree 1	free degree 2	significance						sound	F	free degree 1	free degree 2	significance
							4	16.984	2	126	2.945e-07						0	1.046	2	126	0.354
							7	1.913	2	126	0.152						1	4.666	2	126	0.011
							10	3.962	2	126	0.021						2	4.381	2	126	0.014
12d pn
Fixed effect a							Paired comparison										Paired comparison
source	F	free degree 1	free degree 2	significance			sound Paired comparison	Comparative estimation	Standard error	t	free degree	Adj.significance	95% confidence interval				density Paired comparison	Comparative estimation	Standard error	t	free degree	Adj.significance	95% confidence interval
Revise the model	6.125	8	126	0									lower limit	upper limit									lower limit	upper limit
sound	21.348	2	126	0			0 - 1	-2.039	0.729	-2.795	126	0.006	-3.482	-0.595			4~7	0.332	0.561	0.593	126	0.707	-0.836	1.501
density	1.187	2	126	0.309			0 - 2	1.844	0.511	3.608	126	0.001	0.685	3.004			4~10	-0.568	0.61	-0.931	126	0.707	-1.953	0.816
sound * density	1.316	4	126	0.268			1 - 0	2.039	0.729	2.795	126	0.006	0.595	3.482			7~4	-0.332	0.561	-0.593	126	0.707	-1.501	0.836
Probability distribution: Poisson							1~2	3.883	0.653	5.948	126	7.489e-08	2.299	5.467			7~10	-0.9	0.593	-1.518	126	0.395	-2.34	0.539
Correlation function: logarithmic a							2 - 0	-1.844	0.511	-3.608	126	0.001	-3.004	-0.685			10~4	0.568	0.61	0.931	126	0.707	-0.816	1.953
a target：pn							2~1	-3.883	0.653	-5.948	126	7.489e-08	-5.467	-2.299			10~7	0.9	0.593	1.518	126	0.395	-0.539	2.34
							The significance level after adjusting for sequential Bonferroni is. 05.										The significance level after adjusting for sequential Bonferroni is. 05.
							The confidence interval limit is an approximate value.										The confidence interval limit is an approximate value.
24d pn
Fixed effect a							Paired comparison										Paired comparison
source	F	free degree 1	free degree 2	significance			sound Paired comparison	Comparative estimation	Standard error	t	free degree	Adj.significance	95% confidence interval				density Paired comparison	Comparative estimation	Standard error	t	free degree	Adj.significance	95% confidence interval
Revise the model	11.895	8	126	0									lower limit	upper limit									lower limit	upper limit
sound	41.563	2	126	0			0 - 1	-5.462	0.864	-6.323	126	8.123e-09	-7.422	-3.503			4~7	0.637	0.79	0.806	126	1	-1.281	2.554
density	0.367	2	126	0.693			0 - 2	1.598	0.662	2.414	126	0.017	0.288	2.907			4~10	0.521	0.802	0.65	126	1	-1.287	2.33
sound * density	1.391	4	126	0.241			1 - 0	5.462	0.864	6.323	126	8.123e-09	3.503	7.422			7~4	-0.637	0.79	-0.806	126	1	-2.554	1.281
Probability distribution: Poisson							1~2	7.06	0.823	8.578	126	8.993e-14	5.063	9.057			7~10	-0.115	0.763	-0.151	126	1	-1.667	1.437
Correlation function: logarithmic a							2 - 0	-1.598	0.662	-2.414	126	0.017	-2.907	-0.288			10~4	-0.521	0.802	-0.65	126	1	-2.33	1.287
a target：pn							2~1	-7.06	0.823	-8.578	126	8.993e-14	-9.057	-5.063			10~7	0.115	0.763	0.151	126	1	-1.437	1.667
							The significance level after adjusting for sequential Bonferroni is. 05.										The significance level after adjusting for sequential Bonferroni is. 05.
							The confidence interval limit is an approximate value.										The confidence interval limit is an approximate value.

## Sheet: Feather-pecking-GlMM(Normal)
3d fn
Fixed effecta							Paired comparison									Paired comparison
source	F	free degree 1	free degree 2	significance			sound Paired comparison	Comparative estimation	Standard error	t	free degree	Adj.significance	95% confidence interval			density Paired comparison	Comparative estimation	Standard error	t	free degree	Adj.significance	95% confidence interval
Revise the model	17.505	8	126	0									lower limit	upper limit								lower limit	upper limit
sound	62.863	2	126	0			0 - 1	1.578	0.421	3.745	126	0	0.744	2.411		4~7	-0.689	0.421	-1.635	126	0.104	-1.523	0.145
density	2.64	2	126	0.075			0 - 2	-3.067	0.421	-7.28	126	3.172e-11	-3.9	-2.233		4~10	-0.933	0.421	-2.216	126	0.029	-1.767	-0.1
sound * density	2.259	4	126	0.066			1 - 0	-1.578	0.421	-3.745	126	0	-2.411	-0.744		7~4	0.689	0.421	1.635	126	0.104	-0.145	1.523
Probability distribution: Normal							1~2	-4.644	0.421	-11.025	126	0	-5.478	-3.811		7~10	-0.244	0.421	-0.58	126	0.563	-1.078	0.589
Correlation function: identity equation							2 - 0	3.067	0.421	7.28	126	3.172e-11	2.233	3.9		10~4	0.933	0.421	2.216	126	0.029	0.1	1.767
a target：fn							2~1	4.644	0.421	11.025	126	0	3.811	5.478		10~7	0.244	0.421	0.58	126	0.563	-0.589	1.078
							The adjusted significance level for the minimum significance difference is. 05.									The adjusted significance level for the minimum significance difference is. 05.
3d fd
Fixed effecta							LSD																			Bonferroni
source	F	free degree 1	free degree 2	significance			Paired comparison									Paired comparison										Paired comparison									Paired comparison
Revise the model	11.296	8	126	0			sound Paired comparison	Comparative estimation	Standard error	t	free degree	Adj.significance	95% confidence interval			density Paired comparison	Comparative estimation	Standard error	t	free degree	Adj.significance	95% confidence interval				sound Paired comparison	Comparative estimation	Standard error	t	free degree	Adj.significance	95% confidence interval			density Paired comparison	Comparative estimation	Standard error	t	free degree	Adj.significance	95% confidence interval
sound	38.589	2	126	0									lower limit	upper limit								lower limit	upper limit									lower limit	upper limit								lower limit	upper limit
density	3.591	2	126	0.03			0 - 1	7.578	3.097	2.446	126	0.016	1.448	13.707		4~7	-4.956	3.097	-1.6	126	0.112	-11.085	1.174			0 - 1	7.578	3.097	2.446	126	0.016	1.448	13.707		4~7	-4.956	3.097	-1.6	126	0.224	-11.982	2.071
sound * density	1.501	4	126	0.206			0 - 2	-18.844	3.097	-6.084	126	1.304e-08	-24.974	-12.715		4~10	-8.244	3.097	-2.662	126	0.009	-14.374	-2.115			0 - 2	-18.844	3.097	-6.084	126	2.607e-08	-25.871	-11.818		4~10	-8.244	3.097	-2.662	126	0.026	-15.76	-0.729
Probability distribution: Normal							1 - 0	-7.578	3.097	-2.446	126	0.016	-13.707	-1.448		7~4	4.956	3.097	1.6	126	0.112	-1.174	11.085			1 - 0	-7.578	3.097	-2.446	126	0.016	-13.707	-1.448		7~4	4.956	3.097	1.6	126	0.224	-2.071	11.982
Correlation function: identity equation							1~2	-26.422	3.097	-8.53	126	3.908e-14	-32.552	-20.293		7~10	-3.289	3.097	-1.062	126	0.29	-9.419	2.841			1~2	-26.422	3.097	-8.53	126	1.172e-13	-33.938	-18.907		7~10	-3.289	3.097	-1.062	126	0.29	-9.419	2.841
a target：fd							2 - 0	18.844	3.097	6.084	126	1.304e-08	12.715	24.974		10~4	8.244	3.097	2.662	126	0.009	2.115	14.374			2 - 0	18.844	3.097	6.084	126	2.607e-08	11.818	25.871		10~4	8.244	3.097	2.662	126	0.026	0.729	15.76
							2~1	26.422	3.097	8.53	126	3.908e-14	20.293	32.552		10~7	3.289	3.097	1.062	126	0.29	-2.841	9.419			2~1	26.422	3.097	8.53	126	1.172e-13	18.907	33.938		10~7	3.289	3.097	1.062	126	0.29	-2.841	9.419
							The adjusted significance level for the minimum significance difference is. 05.									The adjusted significance level for the minimum significance difference is. 05.										The significance level after adjusting for sequential Bonferroni is. 05.									The significance level after adjusting for sequential Bonferroni is. 05.
																										The confidence interval limit is an approximate value.									The confidence interval limit is an approximate value.
12d fn
Fixed effecta							Paired comparison										Paired comparison
source	F	free degree 1	free degree 2	significance			sound Paired comparison	Comparative estimation	Standard error	t	free degree	Adj.significance	95% confidence interval				density Paired comparison	Comparative estimation	Standard error	t	free degree	Adj.significance	95% confidence interval
Revise the model	12.63	8	126	0									lower limit	upper limit									lower limit	upper limit
sound	39.275	2	126	0			0 - 1	3.2	0.536	5.966	126	2.295e-08	2.139	4.261			4~7	-1.289	0.536	-2.403	126	0.018	-2.35	-0.227
density	5.103	2	126	0.007			0 - 2	-1.444	0.536	-2.693	126	0.008	-2.506	-0.383			4~10	-1.622	0.536	-3.024	126	0.003	-2.684	-0.561
sound * density	3.072	4	126	0.019			1 - 0	-3.2	0.536	-5.966	126	2.295e-08	-4.261	-2.139			7~4	1.289	0.536	2.403	126	0.018	0.227	2.35
Probability distribution: Normal							1~2	-4.644	0.536	-8.659	126	1.932e-14	-5.706	-3.583			7~10	-0.333	0.536	-0.621	126	0.535	-1.395	0.728
Correlation function: identity equation							2 - 0	1.444	0.536	2.693	126	0.008	0.383	2.506			10~4	1.622	0.536	3.024	126	0.003	0.561	2.684
a target：fn							2~1	4.644	0.536	8.659	126	1.932e-14	3.583	5.706			10~7	0.333	0.536	0.621	126	0.535	-0.728	1.395
							The adjusted significance level for the minimum significance difference is. 05.										The adjusted significance level for the minimum significance difference is. 05.
							Paired comparison										Paired comparison
							density	sound Paired comparison	Comparative estimation	Standard error	t	free degree	Adj.significance	95% confidence interval			sound	density Paired comparison	Comparative estimation	Standard error	t	free degree	Adj.significance	95% confidence interval
														lower limit	upper limit									lower limit	upper limit
							4	0 - 1	1	0.929	1.076	126	0.284	-0.838	2.838		0	4~7	-2.733	0.929	-2.942	126	0.004	-4.572	-0.895
								0 - 2	-3.267	0.929	-3.516	126	0.001	-5.105	-1.428			4~10	-4.2	0.929	-4.521	126	1.402e-05	-6.038	-2.362
								1 - 0	-1	0.929	-1.076	126	0.284	-2.838	0.838			7~4	2.733	0.929	2.942	126	0.004	0.895	4.572
								1~2	-4.267	0.929	-4.593	126	1.046e-05	-6.105	-2.428			7~10	-1.467	0.929	-1.579	126	0.117	-3.305	0.372
								2 - 0	3.267	0.929	3.516	126	0.001	1.428	5.105			10~4	4.2	0.929	4.521	126	1.402e-05	2.362	6.038
								2~1	4.267	0.929	4.593	126	1.046e-05	2.428	6.105			10~7	1.467	0.929	1.579	126	0.117	-0.372	3.305
							7	0 - 1	3.667	0.929	3.947	126	0	1.828	5.505		1	4~7	-0.067	0.929	-0.072	126	0.943	-1.905	1.772
								0 - 2	-1.6	0.929	-1.722	126	0.087	-3.438	0.238			4~10	-0.267	0.929	-0.287	126	0.775	-2.105	1.572
								1 - 0	-3.667	0.929	-3.947	126	0	-5.505	-1.828			7~4	0.067	0.929	0.072	126	0.943	-1.772	1.905
								1~2	-5.267	0.929	-5.669	126	9.299e-08	-7.105	-3.428			7~10	-0.2	0.929	-0.215	126	0.83	-2.038	1.638
								2 - 0	1.6	0.929	1.722	126	0.087	-0.238	3.438			10~4	0.267	0.929	0.287	126	0.775	-1.572	2.105
								2~1	5.267	0.929	5.669	126	9.299e-08	3.428	7.105			10~7	0.2	0.929	0.215	126	0.83	-1.638	2.038
							10	0 - 1	4.933	0.929	5.31	126	4.786e-07	3.095	6.772		2	4~7	-1.067	0.929	-1.148	126	0.253	-2.905	0.772
								0 - 2	0.533	0.929	0.574	126	0.567	-1.305	2.372			4~10	-0.4	0.929	-0.431	126	0.668	-2.238	1.438
								1 - 0	-4.933	0.929	-5.31	126	4.786e-07	-6.772	-3.095			7~4	1.067	0.929	1.148	126	0.253	-0.772	2.905
								1~2	-4.4	0.929	-4.736	126	5.769e-06	-6.238	-2.562			7~10	0.667	0.929	0.718	126	0.474	-1.172	2.505
								2 - 0	-0.533	0.929	-0.574	126	0.567	-2.372	1.305			10~4	0.4	0.929	0.431	126	0.668	-1.438	2.238
								2~1	4.4	0.929	4.736	126	5.769e-06	2.562	6.238			10~7	-0.667	0.929	-0.718	126	0.474	-2.505	1.172
							The adjusted significance level for the minimum significance difference is. 05.										The adjusted significance level for the minimum significance difference is. 05.
							Overall inspection results										Overall inspection results
							density	F	free degree 1	free degree 2	significance						sound	F	free degree 1	free degree 2	significance
							4	11.538	2	126	2.503e-05						0	10.529	2	126	5.909e-05
							7	16.894	2	126	3.163e-07						1	0.045	2	126	0.956
							10	16.987	2	126	2.94e-07						2	0.673	2	126	0.512
12d fd
Fixed effecta							LSD																				Bonferroni
source	F	free degree 1	free degree 2	significance			Paired comparison										Paired comparison										Paired comparison									Paired comparison
Revise the model	10.889	8	126	0			sound Paired comparison	Comparative estimation	Standard error	t	free degree	Adj.significance	95% confidence interval				density Paired comparison	Comparative estimation	Standard error	t	free degree	Adj.significance	95% confidence interval				sound Paired comparison	Comparative estimation	Standard error	t	free degree	Adj.significance	95% confidence interval			density Paired comparison	Comparative estimation	Standard error	t	free degree	Adj.significance	95% confidence interval
sound	33.268	2	126	0									lower limit	upper limit									lower limit	upper limit									lower limit	upper limit								lower limit	upper limit
density	7.195	2	126	0.001			0 - 1	15.289	3.541	4.318	126	3.162e-05	8.281	22.296			4~7	-6.267	3.541	-1.77	126	0.079	-13.274	0.741			0 - 1	15.289	3.541	4.318	126	6.323e-05	7.256	23.322		4~7	-6.267	3.541	-1.77	126	0.091	-13.485	0.952
sound * density	1.547	4	126	0.193			0 - 2	-13.578	3.541	-3.835	126	0	-20.585	-6.57			4~10	-13.422	3.541	-3.791	126	0	-20.43	-6.415			0 - 2	-13.578	3.541	-3.835	126	0	-20.585	-6.57		4~10	-13.422	3.541	-3.791	126	0.001	-22.014	-4.831
Probability distribution: Normal							1 - 0	-15.289	3.541	-4.318	126	3.162e-05	-22.296	-8.281			7~4	6.267	3.541	1.77	126	0.079	-0.741	13.274			1 - 0	-15.289	3.541	-4.318	126	6.323e-05	-23.322	-7.256		7~4	6.267	3.541	1.77	126	0.091	-0.952	13.485
Correlation function: identity equation							1~2	-28.867	3.541	-8.152	126	3.06e-13	-35.874	-21.859			7~10	-7.156	3.541	-2.021	126	0.045	-14.163	-0.148			1~2	-28.867	3.541	-8.152	126	9.179e-13	-37.458	-20.275		7~10	-7.156	3.541	-2.021	126	0.091	-15.188	0.877
a target：fd							2 - 0	13.578	3.541	3.835	126	0	6.57	20.585			10~4	13.422	3.541	3.791	126	0	6.415	20.43			2 - 0	13.578	3.541	3.835	126	0	6.57	20.585		10~4	13.422	3.541	3.791	126	0.001	4.831	22.014
							2~1	28.867	3.541	8.152	126	3.06e-13	21.859	35.874			10~7	7.156	3.541	2.021	126	0.045	0.148	14.163			2~1	28.867	3.541	8.152	126	9.179e-13	20.275	37.458		10~7	7.156	3.541	2.021	126	0.091	-0.877	15.188
							The adjusted significance level for the minimum significance difference is. 05.										The adjusted significance level for the minimum significance difference is. 05.										The significance level after adjusting for sequential Bonferroni is. 05.									The significance level after adjusting for sequential Bonferroni is. 05.
																											The confidence interval limit is an approximate value.									The confidence interval limit is an approximate value.
24d fn
Fixed effecta							Paired comparison										Paired comparison
source	F	free degree 1	free degree 2	significance			sound Paired comparison	Comparative estimation	Standard error	t	free degree	Adj.significance	95% confidence interval				density Paired comparison	Comparative estimation	Standard error	t	free degree	Adj.significance	95% confidence interval
Revise the model	29.834	8	126	0									lower limit	upper limit									lower limit	upper limit
sound	101.366	2	126	0			0 - 1	2.289	0.6	3.818	126	0	1.102	3.475			4~7	-2.667	0.6	-4.448	126	1.884e-05	-3.853	-1.48
density	12.662	2	126	0			0 - 2	-5.978	0.6	-9.97	126	0	-7.164	-4.791			4~10	-2.556	0.6	-4.262	126	3.928e-05	-3.742	-1.369
sound * density	2.655	4	126	0.036			1 - 0	-2.289	0.6	-3.818	126	0	-3.475	-1.102			7~4	2.667	0.6	4.448	126	1.884e-05	1.48	3.853
Probability distribution: Normal							1~2	-8.267	0.6	-13.788	126	0	-9.453	-7.08			7~10	0.111	0.6	0.185	126	0.853	-1.075	1.298
Correlation function: identity equation							2 - 0	5.978	0.6	9.97	126	0	4.791	7.164			10~4	2.556	0.6	4.262	126	3.928e-05	1.369	3.742
a target：fn							2~1	8.267	0.6	13.788	126	0	7.08	9.453			10~7	-0.111	0.6	-0.185	126	0.853	-1.298	1.075
							The adjusted significance level for the minimum significance difference is. 05.										The adjusted significance level for the minimum significance difference is. 05.
							Paired comparison										Paired comparison
							density	sound Paired comparison	Comparative estimation	Standard error	t	free degree	Adj.significance	95% confidence interval			sound	density Paired comparison	Comparative estimation	Standard error	t	free degree	Adj.significance	95% confidence interval
														lower limit	upper limit									lower limit	upper limit
							4	0 - 1	1	1.038	0.963	126	0.337	-1.055	3.055		0	4~7	-2.6	1.038	-2.504	126	0.014	-4.655	-0.545
								0 - 2	-4.933	1.038	-4.751	126	5.429e-06	-6.988	-2.878			4~10	-2.867	1.038	-2.761	126	0.007	-4.922	-0.812
								1 - 0	-1	1.038	-0.963	126	0.337	-3.055	1.055			7~4	2.6	1.038	2.504	126	0.014	0.545	4.655
								1~2	-5.933	1.038	-5.714	126	7.556e-08	-7.988	-3.878			7~10	-0.267	1.038	-0.257	126	0.798	-2.322	1.788
								2 - 0	4.933	1.038	4.751	126	5.429e-06	2.878	6.988			10~4	2.867	1.038	2.761	126	0.007	0.812	4.922
								2~1	5.933	1.038	5.714	126	7.556e-08	3.878	7.988			10~7	0.267	1.038	0.257	126	0.798	-1.788	2.322
							7	0 - 1	3.267	1.038	3.146	126	0.002	1.212	5.322		1	4~7	-0.333	1.038	-0.321	126	0.749	-2.388	1.722
								0 - 2	-7.4	1.038	-7.126	126	7.059e-11	-9.455	-5.345			4~10	-1.267	1.038	-1.22	126	0.225	-3.322	0.788
								1 - 0	-3.267	1.038	-3.146	126	0.002	-5.322	-1.212			7~4	0.333	1.038	0.321	126	0.749	-1.722	2.388
								1~2	-10.667	1.038	-10.272	126	0	-12.722	-8.612			7~10	-0.933	1.038	-0.899	126	0.37	-2.988	1.122
								2 - 0	7.4	1.038	7.126	126	7.059e-11	5.345	9.455			10~4	1.267	1.038	1.22	126	0.225	-0.788	3.322
								2~1	10.667	1.038	10.272	126	0	8.612	12.722			10~7	0.933	1.038	0.899	126	0.37	-1.122	2.988
							10	0 - 1	2.6	1.038	2.504	126	0.014	0.545	4.655		2	4~7	-5.067	1.038	-4.879	126	3.155e-06	-7.122	-3.012
								0 - 2	-5.6	1.038	-5.393	126	3.303e-07	-7.655	-3.545			4~10	-3.533	1.038	-3.403	126	0.001	-5.588	-1.478
								1 - 0	-2.6	1.038	-2.504	126	0.014	-4.655	-0.545			7~4	5.067	1.038	4.879	126	3.155e-06	3.012	7.122
								1~2	-8.2	1.038	-7.896	126	1.215e-12	-10.255	-6.145			7~10	1.533	1.038	1.477	126	0.142	-0.522	3.588
								2 - 0	5.6	1.038	5.393	126	3.303e-07	3.545	7.655			10~4	3.533	1.038	3.403	126	0.001	1.478	5.588
								2~1	8.2	1.038	7.896	126	1.215e-12	6.145	10.255			10~7	-1.533	1.038	-1.477	126	0.142	-3.588	0.522
							The adjusted significance level for the minimum significance difference is. 05.										The adjusted significance level for the minimum significance difference is. 05.
							Overall inspection results										Overall inspection results
							density	F	free degree 1	free degree 2	significance						sound	F	free degree 1	free degree 2	significance
							4	18.714	2	126	7.652e-08						0	4.652	2	126	0.011
							7	55.395	2	126	0						1	0.8	2	126	0.452
							10	32.567	2	126	3.971e-12						2	12.521	2	126	1.097e-05
24d fd
Fixed effecta							LSD																				Bonferroni
source	F	free degree 1	free degree 2	significance			Paired comparison										Paired comparison										Paired comparison									Paired comparison
Revise the model	9.992	8	126	0			sound Paired comparison	Comparative estimation	Standard error	t	free degree	Adj.significance	95% confidence interval				density Paired comparison	Comparative estimation	Standard error	t	free degree	Adj.significance	95% confidence interval				sound Paired comparison	Comparative estimation	Standard error	t	free degree	Adj.significance	95% confidence interval			density Paired comparison	Comparative estimation	Standard error	t	free degree	Adj.significance	95% confidence interval
sound	30.204	2	126	0									lower limit	upper limit									lower limit	upper limit									lower limit	upper limit								lower limit	upper limit
density	5.784	2	126	0.004			0 - 1	15.2	4.259	3.569	126	0.001	6.771	23.629			4~7	-12.844	4.259	-3.016	126	0.003	-21.273	-4.416			0 - 1	15.2	4.259	3.569	126	0.001	6.771	23.629		4~7	-12.844	4.259	-3.016	126	0.009	-23.178	-2.51
sound * density	1.99	4	126	0.1			0 - 2	-17.867	4.259	-4.195	126	5.107e-05	-26.295	-9.438			4~10	-12.222	4.259	-2.87	126	0.005	-20.651	-3.794			0 - 2	-17.867	4.259	-4.195	126	0	-27.528	-8.205		4~10	-12.222	4.259	-2.87	126	0.01	-21.884	-2.561
Probability distribution: Normal							1 - 0	-15.2	4.259	-3.569	126	0.001	-23.629	-6.771			7~4	12.844	4.259	3.016	126	0.003	4.416	21.273			1 - 0	-15.2	4.259	-3.569	126	0.001	-23.629	-6.771		7~4	12.844	4.259	3.016	126	0.009	2.51	23.178
Correlation function: identity equation							1~2	-33.067	4.259	-7.764	126	2.468e-12	-41.495	-24.638			7~10	0.622	4.259	0.146	126	0.884	-7.806	9.051			1~2	-33.067	4.259	-7.764	126	7.403e-12	-43.401	-22.733		7~10	0.622	4.259	0.146	126	0.884	-7.806	9.051
a target：fd							2 - 0	17.867	4.259	4.195	126	5.107e-05	9.438	26.295			10~4	12.222	4.259	2.87	126	0.005	3.794	20.651			2 - 0	17.867	4.259	4.195	126	0	8.205	27.528		10~4	12.222	4.259	2.87	126	0.01	2.561	21.884
							2~1	33.067	4.259	7.764	126	2.468e-12	24.638	41.495			10~7	-0.622	4.259	-0.146	126	0.884	-9.051	7.806			2~1	33.067	4.259	7.764	126	7.403e-12	22.733	43.401		10~7	-0.622	4.259	-0.146	126	0.884	-9.051	7.806
							The adjusted significance level for the minimum significance difference is. 05.										The adjusted significance level for the minimum significance difference is. 05.										The significance level after adjusting for sequential Bonferroni is. 05.									The significance level after adjusting for sequential Bonferroni is. 05.
																											The confidence interval limit is an approximate value.									The confidence interval limit is an approximate value.

## Sheet: Feather-pecking-GLMM(Poisson)
3d fn
Fixed effect a							Paired comparison										Paired comparison
source	F	free degree 1	free degree 2	significance			sound Paired comparison	Comparative estimation	Standard error	t	free degree	Adj.significance	95% confidence interval				density Paired comparison	Comparative estimation	Standard error	t	free degree	Adj.significance	95% confidence interval
Revise the model	17.262	8	126	0									lower limit	upper limit									lower limit	upper limit
sound	64.819	2	126	0			0 - 1	1.241	0.25	4.963	126	2.198e-06	0.746	1.735			4~7	-0.822	0.328	-2.507	126	0.04	-1.617	-0.026
density	3.238	2	126	0.043			0 - 2	-3.251	0.477	-6.812	126	7.056e-10	-4.333	-2.168			4~10	-0.589	0.337	-1.747	126	0.166	-1.353	0.176
sound * density	3.531	4	126	0.009			1 - 0	-1.241	0.25	-4.963	126	2.198e-06	-1.735	-0.746			7~4	0.822	0.328	2.507	126	0.04	0.026	1.617
Probability distribution: Poisson							1~2	-4.491	0.433	-10.38	126	0	-5.541	-3.441			7~10	0.233	0.38	0.614	126	0.541	-0.519	0.986
Correlation function: logarithmic a							2 - 0	3.251	0.477	6.812	126	7.056e-10	2.168	4.333			10~4	0.589	0.337	1.747	126	0.166	-0.176	1.353
a target：fn							2~1	4.491	0.433	10.38	126	0	3.441	5.541			10~7	-0.233	0.38	-0.614	126	0.541	-0.986	0.519
							The significance level after adjusting for sequential Bonferroni is. 05.										The significance level after adjusting for sequential Bonferroni is. 05.
							The confidence interval limit is an approximate value.										The confidence interval limit is an approximate value.
							Paired comparison										Paired comparison
							density	sound Paired comparison	Comparative estimation	Standard error	t	free degree	Adj.significance	95% confidence interval			sound	density Paired comparison	Comparative estimation	Standard error	t	free degree	Adj.significance	95% confidence interval
														lower limit	upper limit									lower limit	upper limit
							4	0 - 1	0.2	0.284	0.703	126	0.483	-0.362	0.761		0	4~7	-2.116	0.536	-3.947	126	0	-3.417	-0.815
								0 - 2	-4.037	0.733	-5.504	126	3.975e-07	-5.701	-2.373			4~10	-1.888	0.513	-3.683	126	0.001	-3.051	-0.725
								1 - 0	-0.2	0.284	-0.703	126	0.483	-0.761	0.362			7~4	2.116	0.536	3.947	126	0	0.815	3.417
								1~2	-4.237	0.724	-5.853	126	1.179e-07	-5.993	-2.48			7~10	0.228	0.675	0.338	126	0.736	-1.108	1.564
								2 - 0	4.037	0.733	5.504	126	3.975e-07	2.373	5.701			10~4	1.888	0.513	3.683	126	0.001	0.725	3.051
								2~1	4.237	0.724	5.853	126	1.179e-07	2.48	5.993			10~7	-0.228	0.675	-0.338	126	0.736	-1.564	1.108
							7	0 - 1	2.189	0.531	4.123	126	0	0.984	3.393		1	4~7	-0.127	0.274	-0.462	126	1	-0.72	0.467
								0 - 2	-1.751	0.84	-2.084	126	0.039	-3.414	-0.088			4~10	0.132	0.24	0.549	126	1	-0.414	0.678
								1 - 0	-2.189	0.531	-4.123	126	0	-3.393	-0.984			7~4	0.127	0.274	0.462	126	1	-0.467	0.72
								1~2	-3.94	0.713	-5.529	126	5.317e-07	-5.669	-2.211			7~10	0.259	0.258	1.004	126	0.951	-0.366	0.884
								2 - 0	1.751	0.84	2.084	126	0.039	0.088	3.414			10~4	-0.132	0.24	-0.549	126	1	-0.678	0.414
								2~1	3.94	0.713	5.529	126	5.317e-07	2.211	5.669			10~7	-0.259	0.258	-1.004	126	0.951	-0.884	0.366
							10	0 - 1	2.22	0.49	4.53	126	2.703e-05	1.108	3.331		2	4~7	0.17	0.978	0.174	126	0.862	-1.765	2.106
								0 - 2	-3.118	0.927	-3.363	126	0.001	-4.952	-1.283			4~10	-0.969	1.065	-0.909	126	0.845	-3.447	1.51
								1 - 0	-2.22	0.49	-4.53	126	2.703e-05	-3.331	-1.108			7~4	-0.17	0.978	-0.174	126	0.862	-2.106	1.765
								1~2	-5.337	0.817	-6.529	126	4.41e-09	-7.321	-3.354			7~10	-1.139	1.053	-1.081	126	0.845	-3.695	1.417
								2 - 0	3.118	0.927	3.363	126	0.001	1.283	4.952			10~4	0.969	1.065	0.909	126	0.845	-1.51	3.447
								2~1	5.337	0.817	6.529	126	4.41e-09	3.354	7.321			10~7	1.139	1.053	1.081	126	0.845	-1.417	3.695
							The significance level after adjusting for sequential Bonferroni is. 05.										The significance level after adjusting for sequential Bonferroni is. 05.
							The confidence interval limit is an approximate value.										The confidence interval limit is an approximate value.
							Overall inspection results										Overall inspection results
							density	F	free degree 1	free degree 2	significance						sound	F	free degree 1	free degree 2	significance
							4	17.159	2	126	2.568e-07						0	12.441	2	126	1.172e-05
							7	21.53	2	126	9.053e-09						1	0.518	2	126	0.597
							10	29.873	2	126	2.407e-11						2	0.646	2	126	0.526
12d fn
Fixed effect a							Paired comparison										Paired comparison
source	F	free degree 1	free degree 2	significance			sound Paired comparison	Comparative estimation	Standard error	t	free degree	Adj.significance	95% confidence interval				density Paired comparison	Comparative estimation	Standard error	t	free degree	Adj.significance	95% confidence interval
Revise the model	9.342	8	126	0									lower limit	upper limit									lower limit	upper limit
sound	29.619	2	126	0			0 - 1	2.754	0.473	5.821	126	9.148e-08	1.681	3.827			4~7	-0.949	0.545	-1.741	126	0.168	-2.185	0.287
density	2.94	2	126	0.056			0 - 2	-1.88	0.653	-2.877	126	0.005	-3.173	-0.587			4~10	-1.331	0.557	-2.388	126	0.055	-2.684	0.021
sound * density	2.268	4	126	0.066			1 - 0	-2.754	0.473	-5.821	126	9.148e-08	-3.827	-1.681			7~4	0.949	0.545	1.741	126	0.168	-0.287	2.185
Probability distribution: Poisson							1~2	-4.634	0.532	-8.713	126	4.33e-14	-5.925	-3.343			7~10	-0.382	0.623	-0.614	126	0.54	-1.615	0.85
Correlation function: logarithmic a							2 - 0	1.88	0.653	2.877	126	0.005	0.587	3.173			10~4	1.331	0.557	2.388	126	0.055	-0.021	2.684
a target：fn							2~1	4.634	0.532	8.713	126	4.33e-14	3.343	5.925			10~7	0.382	0.623	0.614	126	0.54	-0.85	1.615
							The significance level after adjusting for sequential Bonferroni is. 05.										The significance level after adjusting for sequential Bonferroni is. 05.
							The confidence interval limit is an approximate value.										The confidence interval limit is an approximate value.
24d fn
Fixed effect a							Paired comparison										Paired comparison
source	F	free degree 1	free degree 2	significance			sound Paired comparison	Comparative estimation	Standard error	t	free degree	Adj.significance	95% confidence interval				density Paired comparison	Comparative estimation	Standard error	t	free degree	Adj.significance	95% confidence interval
Revise the model	26.076	8	126	0									lower limit	upper limit									lower limit	upper limit
sound	90.175	2	126	0			0 - 1	2.107	0.421	5.004	126	1.842e-06	1.274	2.941			4~7	-1.837	0.536	-3.429	126	0.002	-3.052	-0.621
density	10.38	2	126	0			0 - 2	-5.94	0.694	-8.558	126	6.706e-14	-7.514	-4.365			4~10	-2.422	0.536	-4.519	126	4.241e-05	-3.723	-1.122
sound * density	1.203	4	126	0.313			1 - 0	-2.107	0.421	-5.004	126	1.842e-06	-2.941	-1.274			7~4	1.837	0.536	3.429	126	0.002	0.621	3.052
Probability distribution: Poisson							1~2	-8.047	0.64	-12.564	126	0	-9.601	-6.493			7~10	-0.586	0.612	-0.957	126	0.341	-1.797	0.626
Correlation function: logarithmic a							2 - 0	5.94	0.694	8.558	126	6.706e-14	4.365	7.514			10~4	2.422	0.536	4.519	126	4.241e-05	1.122	3.723
a target：fn							2~1	8.047	0.64	12.564	126	0	6.493	9.601			10~7	0.586	0.612	0.957	126	0.341	-0.626	1.797
							The significance level after adjusting for sequential Bonferroni is. 05.										The significance level after adjusting for sequential Bonferroni is. 05.
							The confidence interval limit is an approximate value.										The confidence interval limit is an approximate value.
